# Supplementary material for: The Burden of Early-Onset Colorectal Cancer and Its Risk Factors from 1990 to 2019: A Systematic Analysis for the Global Burden of Disease Study 2019
Source: MDPI journal article supplement (doi:10.3390/cancers14143502), 2022-07-19
Supplement: s1 [file s1]

**Table S1.** Incidence of early-onset colorectal cancer in 203 countries.

| Country                               | 2019             |         |          |                              |       |       | Change of incidence rate |        |        |
|---------------------------------------|------------------|---------|----------|------------------------------|-------|-------|--------------------------|--------|--------|
|                                       | Incidence number |         |          | Incidence rate (per 100 000) |       |       | 2019 versus 1990         |        |        |
|                                       | Value            | LUI     | UII      | Value                        | LUI   | UII   | Value                    | LUI    | UII    |
| Afghanistan                           | 383.2            | 211.7   | 587.6    | 2.11                         | 1.16  | 3.23  | 1.4%                     | -35.3% | 78.4%  |
| Albania                               | 63.4             | 45.9    | 84.9     | 4.90                         | 3.55  | 6.56  | 96.0%                    | 38.3%  | 169.1% |
| Algeria                               | 560.1            | 415.1   | 744.7    | 2.50                         | 1.85  | 3.32  | 67.5%                    | 13.8%  | 137.1% |
| American Samoa                        | 1.5              | 1.1     | 2.0      | 5.32                         | 3.86  | 7.22  | 42.8%                    | -3.7%  | 108.5% |
| Andorra                               | 5.6              | 3.9     | 7.8      | 13.70                        | 9.49  | 18.95 | 63.5%                    | -0.6%  | 156.1% |
| Angola                                | 232.8            | 151.3   | 320.4    | 1.72                         | 1.12  | 2.37  | 23.4%                    | -25.0% | 100.8% |
| Antigua and Barbuda                   | 2.0              | 1.6     | 2.5      | 4.25                         | 3.44  | 5.32  | 63.2%                    | 27.7%  | 108.2% |
| Argentina                             | 1632.0           | 1226.0  | 2129.9   | 7.04                         | 5.29  | 9.18  | 62.4%                    | 20.8%  | 113.1% |
| Armenia                               | 74.6             | 61.0    | 90.2     | 5.05                         | 4.13  | 6.11  | 8.3%                     | -12.7% | 31.9%  |
| Australia                             | 1306.2           | 981.0   | 1710.0   | 11.32                        | 8.50  | 14.82 | 32.7%                    | -1.1%  | 73.8%  |
| Austria                               | 261.3            | 200.5   | 335.0    | 6.48                         | 4.97  | 8.30  | -36.5%                   | -51.8% | -17.6% |
| Azerbaijan                            | 296.1            | 233.4   | 372.4    | 5.32                         | 4.20  | 6.69  | 12.3%                    | -12.2% | 42.5%  |
| Bahamas                               | 16.9             | 13.2    | 21.5     | 8.24                         | 6.45  | 10.48 | 69.7%                    | 28.0%  | 121.3% |
| Bahrain                               | 38.5             | 28.5    | 50.2     | 4.16                         | 3.08  | 5.43  | 117.7%                   | 53.1%  | 201.2% |
| Bangladesh                            | 919.7            | 590.0   | 1366.6   | 1.07                         | 0.68  | 1.59  | 34.0%                    | -21.0% | 131.1% |
| Barbados                              | 12.1             | 9.5     | 15.2     | 8.61                         | 6.81  | 10.87 | 78.7%                    | 40.5%  | 129.5% |
| Belarus                               | 341.2            | 251.5   | 462.1    | 7.83                         | 5.77  | 10.60 | 13.8%                    | -17.0% | 52.6%  |
| Belgium                               | 352.7            | 262.5   | 467.3    | 7.04                         | 5.24  | 9.33  | 7.3%                     | -21.1% | 42.3%  |
| Belize                                | 7.5              | 6.2     | 8.8      | 3.33                         | 2.78  | 3.93  | 213.6%                   | 151.1% | 301.2% |
| Benin                                 | 65.6             | 44.4    | 93.5     | 1.13                         | 0.76  | 1.61  | 21.1%                    | -19.1% | 81.1%  |
| Bermuda                               | 2.9              | 2.2     | 3.7      | 10.28                        | 7.93  | 13.38 | 54.0%                    | 14.8%  | 105.4% |
| Bhutan                                | 6.0              | 3.0     | 9.4      | 1.39                         | 0.69  | 2.15  | 73.9%                    | -0.7%  | 219.5% |
| Bolivia                               | 168.6            | 110.1   | 237.7    | 2.76                         | 1.80  | 3.89  | 66.5%                    | 3.0%   | 157.5% |
| Bosnia and Herzegovina                | 136.3            | 103.2   | 175.8    | 8.98                         | 6.80  | 11.58 | 119.9%                   | 62.4%  | 192.0% |
| Botswana                              | 51.4             | 29.9    | 78.6     | 3.89                         | 2.26  | 5.94  | 130.0%                   | 25.4%  | 291.6% |
| Brazil                                | 5615.3           | 5286.4  | 5915.3   | 4.86                         | 4.58  | 5.12  | 97.2%                    | 84.3%  | 110.6% |
| Brunei Darussalam                     | 26.2             | 21.3    | 32.0     | 9.86                         | 8.01  | 12.02 | 62.3%                    | 17.2%  | 114.6% |
| Bulgaria                              | 363.8            | 271.9   | 477.6    | 12.00                        | 8.97  | 15.76 | 41.0%                    | 4.9%   | 88.0%  |
| Burkina Faso                          | 116.8            | 81.3    | 160.3    | 1.14                         | 0.79  | 1.57  | 34.3%                    | -8.3%  | 89.3%  |
| Burundi                               | 73.4             | 49.5    | 107.1    | 1.34                         | 0.90  | 1.95  | -12.1%                   | -45.8% | 55.6%  |
| Cabo Verde                            | 6.4              | 4.7     | 8.8      | 2.10                         | 1.53  | 2.86  | 121.1%                   | 58.6%  | 214.4% |
| Cambodia                              | 340.2            | 255.2   | 463.0    | 3.87                         | 2.90  | 5.27  | 86.1%                    | 20.2%  | 198.9% |
| Cameroon                              | 250.3            | 162.5   | 363.7    | 1.74                         | 1.13  | 2.53  | 23.3%                    | -23.3% | 91.3%  |
| Canada                                | 1761.2           | 1308.8  | 2319.1   | 10.89                        | 8.09  | 14.34 | 37.9%                    | 1.4%   | 85.5%  |
| Central African Republic              | 33.7             | 22.5    | 50.3     | 1.32                         | 0.88  | 1.97  | -6.3%                    | -39.3% | 44.8%  |
| Chad                                  | 68.8             | 48.7    | 94.6     | 1.01                         | 0.71  | 1.38  | 29.0%                    | -11.6% | 88.3%  |
| Chile                                 | 477.8            | 355.4   | 624.0    | 5.20                         | 3.86  | 6.79  | 115.2%                   | 55.2%  | 187.3% |
| China                                 | 87382.8          | 72880.2 | 103288.4 | 12.12                        | 10.11 | 14.33 | 238.1%                   | 165.9% | 325.9% |
| Colombia                              | 1239.8           | 917.1   | 1642.9   | 4.98                         | 3.68  | 6.60  | 122.4%                   | 62.8%  | 196.5% |
| Comoros                               | 7.0              | 4.0     | 10.1     | 1.87                         | 1.07  | 2.71  | 49.6%                    | -22.7% | 450.1% |
| Congo                                 | 64.5             | 40.2    | 95.6     | 2.41                         | 1.50  | 3.57  | 13.5%                    | -35.1% | 102.4% |
| Cook Islands                          | 0.3              | 0.2     | 0.4      | 3.73                         | 2.23  | 5.19  | 48.8%                    | -16.5% | 143.5% |
| Costa Rica                            | 191.1            | 144.6   | 251.2    | 7.66                         | 5.79  | 10.06 | 183.8%                   | 109.4% | 277.3% |
| Croatia                               | 189.1            | 138.0   | 248.8    | 10.14                        | 7.41  | 13.35 | 37.3%                    | -0.6%  | 85.3%  |
| Cuba                                  | 392.6            | 302.2   | 499.0    | 7.40                         | 5.69  | 9.40  | 74.6%                    | 33.9%  | 124.5% |
| Cyprus                                | 41.5             | 33.2    | 50.4     | 6.02                         | 4.81  | 7.30  | 126.9%                   | 71.3%  | 194.2% |
| Czechia                               | 428.7            | 324.8   | 550.4    | 8.93                         | 6.76  | 11.46 | -8.7%                    | -31.4% | 18.1%  |
| Cote d'Ivoire                         | 198.6            | 133.9   | 276.0    | 1.52                         | 1.03  | 2.11  | 13.9%                    | -28.6% | 69.7%  |
| Democratic People's Republic of Korea | 862.4            | 537.6   | 1328.6   | 6.20                         | 3.86  | 9.55  | 16.9%                    | -33.5% | 100.5% |
| Democratic Republic of the Congo      | 424.2            | 271.4   | 635.3    | 1.02                         | 0.65  | 1.52  | -0.9%                    | -41.5% | 52.0%  |
| Denmark                               | 202.2            | 149.0   | 266.1    | 7.89                         | 5.81  | 10.38 | 12.7%                    | -17.3% | 52.2%  |

| Country                          | 2019             |         |         |                              |       |       | Change of incidence rate |        |        |
|----------------------------------|------------------|---------|---------|------------------------------|-------|-------|--------------------------|--------|--------|
|                                  | Incidence number |         |         | Incidence rate (per 100 000) |       |       | 2019 versus 1990         |        |        |
|                                  | Value            | LUI     | UII     | Value                        | LUI   | UII   | Value                    | LUI    | UII    |
| Djibouti                         | 15.9             | 9.3     | 25.0    | 2.48                         | 1.45  | 3.90  | 84.1%                    | 3.5%   | 215.6% |
| Dominica                         | 1.4              | 1.1     | 1.9     | 4.23                         | 3.19  | 5.52  | 58.4%                    | 13.2%  | 118.0% |
| Dominican Republic               | 262.7            | 179.0   | 360.4   | 4.55                         | 3.10  | 6.25  | 170.3%                   | 82.9%  | 282.1% |
| Ecuador                          | 418.2            | 315.3   | 551.7   | 4.55                         | 3.43  | 6.00  | 188.7%                   | 111.1% | 284.3% |
| Egypt                            | 1359.9           | 946.0   | 1871.1  | 2.64                         | 1.84  | 3.64  | 60.9%                    | 10.5%  | 128.1% |
| El Salvador                      | 139.5            | 100.6   | 190.6   | 4.25                         | 3.07  | 5.81  | 201.8%                   | 110.4% | 309.5% |
| Equatorial Guinea                | 15.6             | 8.6     | 26.4    | 2.09                         | 1.15  | 3.53  | 70.6%                    | -15.6% | 203.7% |
| Eritrea                          | 71.6             | 48.5    | 103.5   | 2.07                         | 1.40  | 3.00  | 58.4%                    | -1.2%  | 161.6% |
| Estonia                          | 51.8             | 38.0    | 68.3    | 8.90                         | 6.54  | 11.74 | 37.1%                    | -2.5%  | 83.9%  |
| Eswatini                         | 16.7             | 9.5     | 25.8    | 2.77                         | 1.56  | 4.27  | 91.3%                    | 10.6%  | 212.6% |
| Ethiopia                         | 711.0            | 518.1   | 987.0   | 1.35                         | 0.99  | 1.88  | -19.2%                   | -46.4% | 53.9%  |
| Fiji                             | 15.4             | 11.5    | 20.3    | 3.30                         | 2.46  | 4.36  | 40.1%                    | -5.9%  | 109.7% |
| Finland                          | 141.1            | 105.0   | 188.6   | 6.05                         | 4.50  | 8.08  | 3.6%                     | -24.4% | 38.7%  |
| France                           | 2261.1           | 1644.4  | 3053.4  | 7.95                         | 5.78  | 10.74 | 34.9%                    | -2.7%  | 81.3%  |
| Gabon                            | 26.9             | 17.2    | 39.0    | 2.91                         | 1.86  | 4.22  | 17.1%                    | -34.0% | 102.4% |
| Gambia                           | 10.4             | 6.8     | 15.1    | 0.94                         | 0.61  | 1.35  | 45.2%                    | -16.2% | 137.2% |
| Georgia                          | 112.5            | 90.2    | 138.5   | 6.80                         | 5.45  | 8.37  | 17.2%                    | -10.0% | 49.0%  |
| Germany                          | 3036.1           | 2283.3  | 4096.6  | 8.46                         | 6.36  | 11.41 | 14.5%                    | -14.3% | 55.8%  |
| Ghana                            | 317.6            | 219.9   | 437.1   | 1.91                         | 1.32  | 2.63  | 56.0%                    | 4.1%   | 138.4% |
| Greece                           | 338.9            | 256.3   | 446.4   | 7.58                         | 5.73  | 9.98  | 81.4%                    | 34.2%  | 142.1% |
| Greenland                        | 2.5              | 1.9     | 3.3     | 9.37                         | 7.10  | 12.49 | 25.4%                    | -10.0% | 82.5%  |
| Grenada                          | 2.9              | 2.3     | 3.5     | 5.33                         | 4.33  | 6.47  | 78.2%                    | 39.5%  | 125.0% |
| Guam                             | 5.9              | 4.7     | 7.4     | 7.31                         | 5.84  | 9.18  | 70.2%                    | 25.1%  | 132.6% |
| Guatemala                        | 279.4            | 213.0   | 360.3   | 2.92                         | 2.23  | 3.76  | 150.9%                   | 82.0%  | 229.5% |
| Guinea                           | 62.3             | 44.5    | 84.8    | 1.09                         | 0.78  | 1.48  | 23.4%                    | -18.2% | 83.8%  |
| Guinea-Bissau                    | 15.2             | 11.0    | 20.5    | 1.60                         | 1.16  | 2.17  | 7.0%                     | -29.3% | 61.2%  |
| Guyana                           | 20.2             | 14.8    | 27.3    | 4.87                         | 3.57  | 6.59  | 99.2%                    | 41.0%  | 180.4% |
| Haiti                            | 145.3            | 94.9    | 211.6   | 2.22                         | 1.45  | 3.23  | 5.3%                     | -33.2% | 62.5%  |
| Honduras                         | 85.4             | 51.3    | 131.2   | 1.65                         | 0.99  | 2.54  | 25.0%                    | -25.4% | 100.9% |
| Hungary                          | 526.5            | 409.9   | 674.5   | 11.86                        | 9.23  | 15.19 | 27.2%                    | -1.6%  | 63.5%  |
| Iceland                          | 9.2              | 7.7     | 10.9    | 5.65                         | 4.69  | 6.70  | 22.1%                    | -3.0%  | 51.9%  |
| India                            | 14736.4          | 12218.4 | 17329.4 | 1.94                         | 1.61  | 2.28  | 60.3%                    | 25.8%  | 95.6%  |
| Indonesia                        | 6764.9           | 4855.1  | 8818.0  | 4.74                         | 3.40  | 6.18  | 102.1%                   | 53.1%  | 170.4% |
| Iran                             | 1867.1           | 1719.9  | 2045.0  | 3.95                         | 3.64  | 4.33  | 136.9%                   | 85.6%  | 198.9% |
| Iraq                             | 651.5            | 468.0   | 925.4   | 2.82                         | 2.02  | 4.00  | 71.9%                    | 0.8%   | 189.8% |
| Ireland                          | 191.9            | 139.3   | 253.8   | 8.23                         | 5.97  | 10.88 | 24.4%                    | -10.2% | 67.0%  |
| Israel                           | 281.9            | 206.0   | 372.4   | 6.44                         | 4.71  | 8.51  | 40.6%                    | 2.5%   | 87.1%  |
| Italy                            | 2646.3           | 2110.0  | 3239.7  | 10.44                        | 8.32  | 12.78 | 32.9%                    | 6.6%   | 64.6%  |
| Jamaica                          | 87.1             | 63.4    | 115.6   | 5.69                         | 4.14  | 7.55  | 263.4%                   | 160.1% | 396.2% |
| Japan                            | 6649.6           | 5541.5  | 7919.8  | 12.85                        | 10.71 | 15.30 | 22.4%                    | 1.7%   | 45.1%  |
| Jordan                           | 250.4            | 201.7   | 310.4   | 3.95                         | 3.18  | 4.90  | 74.8%                    | 26.0%  | 134.7% |
| Kazakhstan                       | 407.8            | 335.3   | 487.7   | 4.39                         | 3.61  | 5.25  | -1.5%                    | -18.3% | 18.2%  |
| Kenya                            | 375.8            | 288.8   | 483.1   | 1.44                         | 1.11  | 1.85  | 82.1%                    | 35.2%  | 147.7% |
| Kiribati                         | 2.1              | 1.5     | 2.9     | 3.48                         | 2.55  | 4.72  | 4.6%                     | -29.2% | 57.4%  |
| Kuwait                           | 96.9             | 77.0    | 121.0   | 3.33                         | 2.65  | 4.16  | 95.9%                    | 53.5%  | 152.9% |
| Kyrgyzstan                       | 77.5             | 65.1    | 90.4    | 2.31                         | 1.94  | 2.69  | -36.2%                   | -47.9% | -23.1% |
| Lao People's Democratic Republic | 141.6            | 91.3    | 195.6   | 3.63                         | 2.34  | 5.02  | 37.6%                    | -13.5% | 134.3% |
| Latvia                           | 53.3             | 41.3    | 68.8    | 6.50                         | 5.05  | 8.40  | 7.1%                     | -18.5% | 39.6%  |
| Lebanon                          | 182.9            | 133.0   | 239.7   | 6.85                         | 4.98  | 8.97  | 121.1%                   | 36.7%  | 238.3% |
| Lesotho                          | 26.4             | 16.5    | 37.8    | 2.30                         | 1.44  | 3.30  | 156.7%                   | 38.9%  | 333.1% |
| Liberia                          | 27.7             | 16.5    | 41.6    | 1.12                         | 0.67  | 1.68  | 4.1%                     | -38.6% | 58.8%  |
| Libya                            | 210.1            | 147.5   | 292.1   | 5.11                         | 3.59  | 7.11  | 84.5%                    | -1.8%  | 220.5% |

| Country                          | 2019             |        |        |                              |       |       | Change of incidence rate |        |        |
|----------------------------------|------------------|--------|--------|------------------------------|-------|-------|--------------------------|--------|--------|
|                                  | Incidence number |        |        | Incidence rate (per 100 000) |       |       | 2019 versus 1990         |        |        |
|                                  | Value            | LUI    | UII    | Value                        | LUI   | UII   | Value                    | LUI    | UII    |
| Lithuania                        | 76.0             | 57.7   | 97.8   | 6.27                         | 4.76  | 8.07  | 6.5%                     | -20.0% | 35.5%  |
| Luxembourg                       | 21.4             | 17.0   | 26.5   | 6.96                         | 5.54  | 8.62  | -8.9%                    | -28.9% | 14.3%  |
| Madagascar                       | 195.8            | 133.4  | 272.9  | 1.48                         | 1.01  | 2.07  | -0.2%                    | -35.4% | 48.5%  |
| Malawi                           | 84.8             | 56.1   | 122.8  | 0.94                         | 0.62  | 1.36  | 23.3%                    | -21.5% | 92.3%  |
| Malaysia                         | 979.6            | 699.5  | 1319.1 | 5.61                         | 4.01  | 7.56  | 83.8%                    | 24.6%  | 163.2% |
| Maldives                         | 7.9              | 6.3    | 10.1   | 2.49                         | 1.97  | 3.16  | 54.6%                    | -2.3%  | 184.6% |
| Mali                             | 115.9            | 79.7   | 158.3  | 1.20                         | 0.82  | 1.64  | 5.9%                     | -27.0% | 52.1%  |
| Malta                            | 12.8             | 10.2   | 15.7   | 6.50                         | 5.17  | 7.98  | 62.1%                    | 24.6%  | 109.3% |
| Marshall Islands                 | 1.3              | 0.8    | 1.7    | 4.13                         | 2.77  | 5.76  | 68.2%                    | 12.3%  | 138.1% |
| Mauritania                       | 21.6             | 13.8   | 31.5   | 1.12                         | 0.71  | 1.63  | -8.4%                    | -45.5% | 55.8%  |
| Mauritius                        | 35.9             | 27.6   | 45.6   | 5.52                         | 4.24  | 7.02  | 151.2%                   | 89.5%  | 228.4% |
| Mexico                           | 2943.1           | 2499.8 | 3432.6 | 4.44                         | 3.77  | 5.18  | 179.4%                   | 136.3% | 226.2% |
| Micronesia                       | 2.3              | 0.8    | 3.4    | 4.27                         | 1.45  | 6.43  | 39.7%                    | -53.3% | 120.3% |
| Monaco                           | 2.1              | 1.5    | 2.9    | 14.72                        | 10.63 | 20.06 | 37.9%                    | -10.1% | 105.9% |
| Mongolia                         | 60.4             | 44.5   | 82.2   | 3.34                         | 2.46  | 4.55  | 83.8%                    | 28.4%  | 163.8% |
| Montenegro                       | 19.2             | 15.2   | 23.5   | 6.48                         | 5.12  | 7.95  | 35.8%                    | 1.7%   | 75.0%  |
| Morocco                          | 409.3            | 282.0  | 612.9  | 2.14                         | 1.47  | 3.20  | 81.7%                    | 16.3%  | 189.8% |
| Mozambique                       | 173.8            | 110.4  | 251.9  | 1.30                         | 0.83  | 1.89  | 72.9%                    | 9.6%   | 161.1% |
| Myanmar                          | 1219.3           | 823.4  | 1700.3 | 4.22                         | 2.85  | 5.88  | 69.7%                    | 2.6%   | 158.0% |
| Namibia                          | 20.4             | 12.6   | 31.2   | 1.63                         | 1.00  | 2.48  | 81.2%                    | 4.1%   | 220.6% |
| Nauru                            | 0.4              | 0.2    | 0.5    | 6.41                         | 3.65  | 8.96  | 4.9%                     | -28.9% | 52.2%  |
| Nepal                            | 172.6            | 113.5  | 250.9  | 1.07                         | 0.70  | 1.55  | 28.4%                    | -24.6% | 108.2% |
| Netherlands                      | 769.1            | 570.9  | 1002.1 | 10.25                        | 7.61  | 13.35 | 36.1%                    | 1.1%   | 78.6%  |
| New Zealand                      | 214.2            | 170.8  | 261.8  | 10.79                        | 8.60  | 13.19 | 11.4%                    | -12.3% | 40.1%  |
| Nicaragua                        | 98.4             | 74.6   | 125.0  | 2.81                         | 2.13  | 3.57  | 99.5%                    | 40.2%  | 175.6% |
| Niger                            | 69.0             | 45.0   | 103.4  | 0.73                         | 0.48  | 1.09  | -11.6%                   | -41.5% | 27.2%  |
| Nigeria                          | 1034.4           | 719.0  | 1452.7 | 1.03                         | 0.71  | 1.44  | 28.3%                    | -14.4% | 92.6%  |
| Niue                             | 0.0              | 0.0    | 0.1    | 6.00                         | 3.51  | 9.30  | 40.2%                    | -23.2% | 133.5% |
| North Macedonia                  | 88.4             | 67.0   | 115.9  | 8.15                         | 6.18  | 10.69 | 88.8%                    | 40.2%  | 151.6% |
| Northern Mariana Islands         | 1.8              | 1.3    | 2.5    | 8.96                         | 6.36  | 12.30 | 32.1%                    | -19.9% | 118.4% |
| Norway                           | 217.3            | 177.6  | 261.0  | 8.72                         | 7.13  | 10.48 | 18.8%                    | -3.2%  | 44.2%  |
| Oman                             | 65.5             | 47.7   | 98.4   | 2.09                         | 1.53  | 3.14  | 55.8%                    | -11.1% | 159.6% |
| Pakistan                         | 2418.7           | 1820.5 | 3066.7 | 2.16                         | 1.63  | 2.74  | 87.5%                    | 35.0%  | 161.8% |
| Palau                            | 0.6              | 0.4    | 0.8    | 6.04                         | 4.18  | 8.26  | 72.3%                    | 3.9%   | 172.2% |
| Palestine                        | 108.5            | 88.7   | 130.7  | 4.28                         | 3.50  | 5.15  | 45.9%                    | -4.3%  | 132.9% |
| Panama                           | 94.2             | 66.8   | 125.9  | 4.48                         | 3.18  | 5.99  | 114.3%                   | 50.0%  | 193.8% |
| Papua New Guinea                 | 102.9            | 71.4   | 144.2  | 2.02                         | 1.40  | 2.84  | 32.7%                    | -5.7%  | 92.0%  |
| Paraguay                         | 139.6            | 100.0  | 189.5  | 3.75                         | 2.69  | 5.10  | 165.3%                   | 80.7%  | 275.0% |
| Peru                             | 920.5            | 649.2  | 1271.4 | 5.16                         | 3.64  | 7.13  | 146.8%                   | 65.0%  | 260.7% |
| Philippines                      | 3354.3           | 2684.6 | 4197.0 | 5.74                         | 4.59  | 7.18  | 36.5%                    | 7.9%   | 77.9%  |
| Poland                           | 1319.1           | 1088.7 | 1590.6 | 7.25                         | 5.98  | 8.74  | 43.0%                    | 17.5%  | 72.5%  |
| Portugal                         | 647.6            | 466.4  | 857.5  | 13.80                        | 9.94  | 18.28 | 91.7%                    | 38.3%  | 159.7% |
| Puerto Rico                      | 158.1            | 113.8  | 216.4  | 9.98                         | 7.18  | 13.65 | 103.5%                   | 44.3%  | 183.5% |
| Qatar                            | 59.3             | 42.8   | 80.7   | 2.75                         | 1.98  | 3.74  | 74.2%                    | 7.3%   | 175.0% |
| Republic of Korea                | 2408.4           | 1928.5 | 2950.4 | 9.25                         | 7.40  | 11.33 | 139.1%                   | 90.5%  | 197.8% |
| Republic of Moldova              | 129.6            | 106.6  | 155.1  | 7.05                         | 5.80  | 8.44  | 5.2%                     | -13.9% | 27.0%  |
| Romania                          | 886.0            | 701.8  | 1108.8 | 10.23                        | 8.11  | 12.81 | 109.5%                   | 64.6%  | 163.4% |
| Russian Federation               | 6551.4           | 5526.0 | 7685.3 | 9.57                         | 8.07  | 11.22 | 81.8%                    | 56.0%  | 111.4% |
| Rwanda                           | 109.0            | 73.2   | 158.4  | 1.68                         | 1.13  | 2.45  | 0.8%                     | -41.1% | 92.0%  |
| Saint Kitts and Nevis            | 1.6              | 0.5    | 2.5    | 5.09                         | 1.73  | 7.92  | 20.1%                    | -58.5% | 93.6%  |
| Saint Lucia                      | 4.5              | 3.6    | 5.5    | 4.80                         | 3.89  | 5.89  | 96.9%                    | 54.3%  | 145.6% |
| Saint Vincent and the Grenadines | 2.9              | 2.4    | 3.5    | 5.15                         | 4.26  | 6.18  | 112.0%                   | 69.3%  | 161.7% |

| Country                      | 2019             |         |         |                              |      |       | Change of incidence rate |        |        |
|------------------------------|------------------|---------|---------|------------------------------|------|-------|--------------------------|--------|--------|
|                              | Incidence number |         |         | Incidence rate (per 100 000) |      |       | 2019 versus 1990         |        |        |
|                              | Value            | LUI     | UII     | Value                        | LUI  | UII   | Value                    | LUI    | UII    |
| Samoa                        | 2.9              | 1.8     | 4.1     | 2.80                         | 1.75 | 3.98  | 44.7%                    | -15.4% | 137.5% |
| San Marino                   | 1.5              | 1.0     | 2.1     | 9.66                         | 6.81 | 13.57 | 59.3%                    | 7.5%   | 136.1% |
| Sao Tome and Principe        | 2.7              | 1.7     | 4.0     | 2.50                         | 1.57 | 3.70  | 108.7%                   | 23.3%  | 265.7% |
| Saudi Arabia                 | 1146.9           | 810.1   | 1598.2  | 4.71                         | 3.33 | 6.56  | 305.3%                   | 134.8% | 571.5% |
| Senegal                      | 94.5             | 61.0    | 132.2   | 1.29                         | 0.83 | 1.80  | 16.4%                    | -26.3% | 74.3%  |
| Serbia                       | 435.1            | 328.4   | 566.0   | 10.87                        | 8.20 | 14.14 | 53.4%                    | 8.0%   | 117.7% |
| Seychelles                   | 5.7              | 4.7     | 6.8     | 10.45                        | 8.58 | 12.47 | 163.6%                   | 108.9% | 235.5% |
| Sierra Leone                 | 44.1             | 30.0    | 61.7    | 1.06                         | 0.72 | 1.49  | 19.7%                    | -22.2% | 81.3%  |
| Singapore                    | 210.2            | 160.3   | 272.4   | 6.83                         | 5.21 | 8.86  | 2.6%                     | -23.0% | 35.0%  |
| Slovakia                     | 310.4            | 225.6   | 419.6   | 11.80                        | 8.57 | 15.95 | 48.5%                    | 6.9%   | 101.4% |
| Slovenia                     | 84.5             | 61.6    | 116.0   | 9.43                         | 6.87 | 12.95 | 32.3%                    | -16.3% | 100.9% |
| Solomon Islands              | 14.5             | 8.1     | 20.5    | 4.43                         | 2.46 | 6.23  | 57.0%                    | 5.1%   | 124.9% |
| Somalia                      | 88.5             | 48.5    | 169.2   | 0.93                         | 0.51 | 1.79  | -13.6%                   | -53.5% | 44.9%  |
| South Africa                 | 789.4            | 675.0   | 913.0   | 2.59                         | 2.22 | 3.00  | 4.6%                     | -15.3% | 28.2%  |
| South Sudan                  | 70.3             | 41.7    | 115.6   | 1.67                         | 0.99 | 2.74  | 16.0%                    | -26.8% | 96.1%  |
| Spain                        | 2274.7           | 1665.4  | 3048.3  | 11.01                        | 8.06 | 14.75 | 54.2%                    | 12.4%  | 106.0% |
| Sri Lanka                    | 283.5            | 198.8   | 392.6   | 2.60                         | 1.82 | 3.60  | 91.7%                    | 28.5%  | 182.2% |
| Sudan                        | 365.9            | 214.0   | 574.0   | 1.76                         | 1.03 | 2.75  | 58.9%                    | -12.4% | 159.4% |
| Suriname                     | 15.4             | 11.9    | 19.4    | 5.33                         | 4.15 | 6.73  | 97.6%                    | 49.1%  | 175.4% |
| Sweden                       | 320.3            | 264.6   | 382.6   | 7.15                         | 5.91 | 8.54  | 13.2%                    | -7.7%  | 37.3%  |
| Switzerland                  | 262.4            | 195.6   | 345.2   | 6.57                         | 4.90 | 8.64  | 16.7%                    | -15.0% | 56.7%  |
| Syrian Arab Republic         | 174.0            | 124.6   | 240.7   | 2.34                         | 1.68 | 3.24  | 40.6%                    | -12.9% | 123.3% |
| Tajikistan                   | 146.3            | 113.3   | 186.6   | 2.94                         | 2.28 | 3.76  | -24.8%                   | -43.0% | -2.1%  |
| Thailand                     | 2304.6           | 1613.1  | 3170.4  | 6.46                         | 4.52 | 8.88  | 109.3%                   | 45.1%  | 199.8% |
| Timor-Leste                  | 17.1             | 5.5     | 24.7    | 2.62                         | 0.84 | 3.79  | 65.1%                    | -57.4% | 175.4% |
| Togo                         | 54.9             | 35.2    | 79.1    | 1.40                         | 0.90 | 2.01  | 32.7%                    | -12.8% | 92.7%  |
| Tokelau                      | 0.0              | 0.0     | 0.0     | 4.06                         | 2.33 | 6.03  | 58.7%                    | -8.9%  | 155.2% |
| Tonga                        | 0.9              | 0.6     | 1.2     | 1.76                         | 1.23 | 2.47  | 49.7%                    | -1.9%  | 127.1% |
| Trinidad and Tobago          | 40.2             | 27.7    | 55.3    | 5.79                         | 3.99 | 7.96  | 58.0%                    | 9.7%   | 120.0% |
| Tunisia                      | 212.5            | 147.7   | 293.0   | 3.52                         | 2.45 | 4.85  | 146.6%                   | 56.3%  | 265.3% |
| Turkey                       | 2428.7           | 1888.4  | 3120.2  | 5.32                         | 4.14 | 6.83  | 50.6%                    | 2.6%   | 116.1% |
| Turkmenistan                 | 77.2             | 60.7    | 100.0   | 2.93                         | 2.30 | 3.80  | 0.8%                     | -21.6% | 32.6%  |
| Tuvalu                       | 0.2              | 0.1     | 0.3     | 3.72                         | 2.43 | 5.23  | 23.9%                    | -19.5% | 86.7%  |
| Uganda                       | 389.8            | 277.5   | 541.7   | 2.06                         | 1.47 | 2.87  | 120.9%                   | 42.6%  | 250.8% |
| Ukraine                      | 2035.5           | 1663.2  | 2476.0  | 9.79                         | 8.00 | 11.91 | 12.4%                    | -9.5%  | 39.1%  |
| United Arab Emirates         | 289.3            | 191.3   | 409.1   | 4.15                         | 2.75 | 5.87  | 102.5%                   | 8.1%   | 267.4% |
| United Kingdom               | 2707.0           | 2215.2  | 3273.0  | 8.88                         | 7.27 | 10.74 | 28.8%                    | 4.8%   | 56.0%  |
| United Republic of Tanzania  | 482.1            | 327.0   | 702.2   | 1.81                         | 1.23 | 2.63  | 42.3%                    | -3.7%  | 106.6% |
| United States of America     | 16735.3          | 14188.0 | 19774.1 | 11.12                        | 9.42 | 13.13 | 41.7%                    | 20.0%  | 68.5%  |
| United States Virgin Islands | 4.2              | 3.0     | 6.0     | 9.78                         | 6.94 | 13.74 | 60.8%                    | 9.1%   | 140.1% |
| Uruguay                      | 123.4            | 92.0    | 163.8   | 7.49                         | 5.58 | 9.94  | 24.8%                    | -6.9%  | 68.7%  |
| Uzbekistan                   | 578.4            | 480.5   | 693.0   | 3.20                         | 2.66 | 3.83  | 11.4%                    | -8.7%  | 34.9%  |
| Vanuatu                      | 3.9              | 2.5     | 5.6     | 2.69                         | 1.72 | 3.83  | 46.2%                    | -11.8% | 134.6% |
| Venezuela                    | 711.3            | 514.3   | 957.4   | 4.94                         | 3.57 | 6.65  | 133.0%                   | 68.8%  | 218.3% |
| Viet Nam                     | 3496.8           | 2485.0  | 4829.1  | 6.59                         | 4.69 | 9.11  | 313.3%                   | 159.4% | 545.5% |
| Yemen                        | 229.3            | 150.1   | 326.9   | 1.47                         | 0.96 | 2.09  | 41.4%                    | -20.9% | 163.2% |
| Zambia                       | 237.8            | 158.8   | 338.5   | 2.63                         | 1.76 | 3.75  | 49.6%                    | -4.9%  | 124.4% |
| Zimbabwe                     | 206.8            | 139.8   | 288.0   | 2.75                         | 1.86 | 3.83  | 94.3%                    | 24.4%  | 183.5% |

95% UI, 95% uncertainty intervals; LUI, lower uncertainty interval; UII, upper uncertainty interval.

**Table S2.** Deaths of early-onset colorectal cancer in 203 countries.

| Country                               | 2019         |         |         |                          |      |      | Change of death rate |        |        |
|---------------------------------------|--------------|---------|---------|--------------------------|------|------|----------------------|--------|--------|
|                                       | Death number |         |         | Death rate (per 100 000) |      |      | 2019 versus 1990     |        |        |
|                                       | Value        | LUI     | UII     | Value                    | LUI  | UII  | Value                | LUI    | UII    |
| Afghanistan                           | 302.0        | 165.3   | 462.7   | 1.66                     | 0.91 | 2.54 | -3.9%                | -38.9% | 70.4%  |
| Albania                               | 24.1         | 17.5    | 32.6    | 1.86                     | 1.35 | 2.52 | 27.4%                | -8.4%  | 73.7%  |
| Algeria                               | 286.8        | 211.3   | 381.3   | 1.28                     | 0.94 | 1.70 | 27.5%                | -14.1% | 81.1%  |
| American Samoa                        | 0.8          | 0.6     | 1.1     | 3.01                     | 2.19 | 4.08 | 29.6%                | -12.7% | 88.4%  |
| Andorra                               | 1.4          | 1.0     | 1.9     | 3.41                     | 2.38 | 4.65 | 15.5%                | -29.6% | 82.7%  |
| Angola                                | 174.0        | 114.9   | 240.0   | 1.29                     | 0.85 | 1.77 | 13.2%                | -32.0% | 81.4%  |
| Antigua and Barbuda                   | 0.9          | 0.7     | 1.1     | 1.83                     | 1.48 | 2.30 | 29.0%                | 0.7%   | 65.1%  |
| Argentina                             | 781.7        | 706.7   | 865.8   | 3.37                     | 3.05 | 3.73 | 23.9%                | 9.6%   | 39.7%  |
| Armenia                               | 34.2         | 27.8    | 41.1    | 2.32                     | 1.88 | 2.78 | -17.4%               | -33.6% | 1.3%   |
| Australia                             | 282.2        | 253.6   | 315.5   | 2.45                     | 2.20 | 2.73 | -14.4%               | -23.6% | -3.3%  |
| Austria                               | 62.1         | 54.7    | 70.6    | 1.54                     | 1.35 | 1.75 | -57.3%               | -62.8% | -50.9% |
| Azerbaijan                            | 162.3        | 127.8   | 204.3   | 2.92                     | 2.30 | 3.67 | -5.3%                | -26.0% | 19.7%  |
| Bahamas                               | 8.2          | 6.4     | 10.4    | 4.00                     | 3.12 | 5.07 | 44.6%                | 9.1%   | 88.6%  |
| Bahrain                               | 15.8         | 11.6    | 20.5    | 1.71                     | 1.26 | 2.22 | 41.0%                | -0.8%  | 96.2%  |
| Bangladesh                            | 604.9        | 388.1   | 899.5   | 0.70                     | 0.45 | 1.04 | 10.5%                | -34.1% | 92.6%  |
| Barbados                              | 5.1          | 4.0     | 6.4     | 3.62                     | 2.86 | 4.58 | 41.2%                | 10.4%  | 81.1%  |
| Belarus                               | 118.2        | 87.7    | 159.5   | 2.71                     | 2.01 | 3.66 | -23.1%               | -43.5% | 2.9%   |
| Belgium                               | 92.9         | 81.6    | 104.6   | 1.85                     | 1.63 | 2.09 | -27.4%               | -37.0% | -16.6% |
| Belize                                | 3.9          | 3.3     | 4.7     | 1.76                     | 1.48 | 2.09 | 165.7%               | 115.6% | 238.5% |
| Benin                                 | 48.7         | 32.8    | 68.7    | 0.84                     | 0.56 | 1.18 | 14.9%                | -24.3% | 69.2%  |
| Bermuda                               | 0.8          | 0.6     | 1.0     | 2.86                     | 2.22 | 3.71 | -7.3%                | -32.2% | 22.8%  |
| Bhutan                                | 3.8          | 1.9     | 5.9     | 0.87                     | 0.43 | 1.35 | 37.2%                | -21.1% | 150.3% |
| Bolivia                               | 89.5         | 58.7    | 126.4   | 1.46                     | 0.96 | 2.07 | 24.1%                | -22.9% | 91.6%  |
| Bosnia and Herzegovina                | 57.8         | 44.1    | 74.6    | 3.81                     | 2.90 | 4.92 | 57.3%                | 16.2%  | 109.4% |
| Botswana                              | 31.9         | 18.6    | 48.4    | 2.41                     | 1.41 | 3.66 | 96.0%                | 7.7%   | 237.2% |
| Brazil                                | 2784.9       | 2629.9  | 2928.3  | 2.41                     | 2.28 | 2.54 | 51.3%                | 41.4%  | 61.2%  |
| Brunei Darussalam                     | 11.1         | 9.1     | 13.5    | 4.19                     | 3.43 | 5.06 | 24.3%                | -8.6%  | 63.4%  |
| Bulgaria                              | 155.3        | 116.9   | 202.8   | 5.13                     | 3.86 | 6.69 | 13.4%                | -15.5% | 51.1%  |
| Burkina Faso                          | 87.4         | 61.1    | 119.6   | 0.85                     | 0.60 | 1.17 | 26.5%                | -14.2% | 81.8%  |
| Burundi                               | 56.4         | 37.9    | 82.8    | 1.03                     | 0.69 | 1.51 | -15.1%               | -48.8% | 50.5%  |
| Cabo Verde                            | 3.7          | 2.6     | 5.0     | 1.19                     | 0.86 | 1.62 | 77.7%                | 27.5%  | 153.4% |
| Cambodia                              | 213.8        | 161.3   | 289.7   | 2.43                     | 1.84 | 3.30 | 52.7%                | -1.5%  | 146.8% |
| Cameroon                              | 180.0        | 117.3   | 261.9   | 1.25                     | 0.82 | 1.82 | 13.1%                | -30.7% | 77.3%  |
| Canada                                | 362.6        | 323.0   | 406.4   | 2.24                     | 2.00 | 2.51 | -3.3%                | -14.6% | 9.7%   |
| Central African Republic              | 27.0         | 17.9    | 40.5    | 1.05                     | 0.70 | 1.58 | -5.0%                | -38.7% | 47.4%  |
| Chad                                  | 53.3         | 37.3    | 74.1    | 0.78                     | 0.55 | 1.08 | 24.8%                | -14.4% | 82.3%  |
| Chile                                 | 184.3        | 163.4   | 207.1   | 2.00                     | 1.78 | 2.25 | 41.5%                | 22.5%  | 62.4%  |
| China                                 | 26274.2      | 21892.4 | 31077.2 | 3.65                     | 3.04 | 4.31 | 64.1%                | 29.5%  | 105.6% |
| Colombia                              | 490.1        | 360.8   | 648.5   | 1.97                     | 1.45 | 2.60 | 48.9%                | 10.4%  | 97.7%  |
| Comoros                               | 5.2          | 3.0     | 7.6     | 1.40                     | 0.81 | 2.04 | 39.7%                | -28.6% | 407.2% |
| Congo                                 | 48.2         | 29.9    | 71.7    | 1.80                     | 1.12 | 2.68 | 8.2%                 | -38.4% | 94.6%  |
| Cook Islands                          | 0.1          | 0.1     | 0.2     | 1.53                     | 0.91 | 2.12 | 16.8%                | -34.7% | 92.9%  |
| Costa Rica                            | 68.7         | 51.5    | 90.0    | 2.75                     | 2.06 | 3.61 | 116.4%               | 58.6%  | 189.5% |
| Croatia                               | 59.9         | 44.5    | 78.5    | 3.22                     | 2.39 | 4.21 | -2.2%                | -29.3% | 31.2%  |
| Cuba                                  | 140.0        | 108.5   | 174.9   | 2.64                     | 2.04 | 3.29 | 30.8%                | 0.8%   | 67.0%  |
| Cyprus                                | 9.9          | 8.2     | 12.0    | 1.44                     | 1.18 | 1.73 | 18.7%                | -10.3% | 51.4%  |
| Czechia                               | 137.5        | 105.3   | 175.1   | 2.86                     | 2.19 | 3.65 | -40.4%               | -55.3% | -22.8% |
| Cote d'Ivoire                         | 147.8        | 99.4    | 205.5   | 1.13                     | 0.76 | 1.57 | 9.7%                 | -31.4% | 62.8%  |
| Democratic People's Republic of Korea | 472.7        | 296.9   | 723.9   | 3.40                     | 2.13 | 5.20 | 10.7%                | -37.8% | 90.5%  |
| Democratic Republic of the Congo      | 325.9        | 205.7   | 485.7   | 0.78                     | 0.49 | 1.16 | -4.1%                | -44.6% | 50.3%  |
| Denmark                               | 53.8         | 47.2    | 60.6    | 2.10                     | 1.84 | 2.36 | -31.8%               | -41.4% | -21.9% |

| Country                          | 2019         |        |         |                          |      |      | Change of death rate |        |        |
|----------------------------------|--------------|--------|---------|--------------------------|------|------|----------------------|--------|--------|
|                                  | Death number |        |         | Death rate (per 100 000) |      |      | 2019 versus 1990     |        |        |
|                                  | Value        | LUI    | UII     | Value                    | LUI  | UII  | Value                | LUI    | UII    |
| Djibouti                         | 11.6         | 6.8    | 18.3    | 1.81                     | 1.05 | 2.86 | 71.8%                | -2.9%  | 191.3% |
| Dominica                         | 0.8          | 0.6    | 1.0     | 2.28                     | 1.73 | 2.99 | 48.2%                | 4.0%   | 105.2% |
| Dominican Republic               | 139.2        | 94.8   | 193.6   | 2.41                     | 1.64 | 3.36 | 113.6%               | 43.3%  | 202.3% |
| Ecuador                          | 169.7        | 127.8  | 223.2   | 1.85                     | 1.39 | 2.43 | 87.5%                | 36.6%  | 147.1% |
| Egypt                            | 765.9        | 532.6  | 1058.6  | 1.49                     | 1.04 | 2.06 | 24.6%                | -14.1% | 75.3%  |
| El Salvador                      | 65.2         | 47.0   | 88.5    | 1.99                     | 1.43 | 2.70 | 112.9%               | 50.1%  | 191.6% |
| Equatorial Guinea                | 10.5         | 5.8    | 17.7    | 1.40                     | 0.77 | 2.36 | 41.2%                | -30.3% | 158.9% |
| Eritrea                          | 55.7         | 37.7   | 80.7    | 1.61                     | 1.09 | 2.34 | 51.1%                | -6.7%  | 149.0% |
| Estonia                          | 14.5         | 10.6   | 19.3    | 2.49                     | 1.82 | 3.31 | -18.0%               | -41.4% | 11.1%  |
| Eswatini                         | 12.0         | 6.9    | 18.6    | 1.98                     | 1.14 | 3.07 | 80.2%                | 4.3%   | 196.5% |
| Ethiopia                         | 525.4        | 382.3  | 728.0   | 1.00                     | 0.73 | 1.39 | -26.9%               | -52.5% | 40.7%  |
| Fiji                             | 9.7          | 7.2    | 12.8    | 2.08                     | 1.54 | 2.74 | 29.7%                | -12.6% | 95.4%  |
| Finland                          | 34.4         | 29.9   | 39.2    | 1.47                     | 1.28 | 1.68 | -29.5%               | -40.6% | -18.1% |
| France                           | 584.1        | 510.8  | 658.0   | 2.05                     | 1.80 | 2.31 | -13.8%               | -25.7% | -1.8%  |
| Gabon                            | 18.6         | 11.8   | 26.9    | 2.02                     | 1.28 | 2.92 | 7.0%                 | -40.6% | 84.4%  |
| Gambia                           | 7.6          | 5.0    | 11.0    | 0.68                     | 0.45 | 0.99 | 37.3%                | -21.4% | 126.7% |
| Georgia                          | 58.4         | 46.7   | 72.0    | 3.53                     | 2.82 | 4.35 | 10.1%                | -15.2% | 39.8%  |
| Germany                          | 790.9        | 708.5  | 883.8   | 2.20                     | 1.97 | 2.46 | -23.3%               | -32.1% | -13.6% |
| Ghana                            | 216.5        | 149.7  | 297.5   | 1.30                     | 0.90 | 1.79 | 41.9%                | -4.7%  | 118.9% |
| Greece                           | 93.2         | 84.2   | 102.7   | 2.08                     | 1.88 | 2.30 | 37.7%                | 22.3%  | 53.7%  |
| Greenland                        | 1.2          | 0.9    | 1.6     | 4.54                     | 3.48 | 6.04 | -1.0%                | -29.8% | 43.1%  |
| Grenada                          | 1.5          | 1.2    | 1.8     | 2.70                     | 2.18 | 3.26 | 45.9%                | 13.3%  | 83.9%  |
| Guam                             | 2.9          | 2.3    | 3.6     | 3.52                     | 2.80 | 4.43 | 60.1%                | 17.7%  | 117.1% |
| Guatemala                        | 159.3        | 121.9  | 205.8   | 1.67                     | 1.27 | 2.15 | 96.5%                | 46.2%  | 166.0% |
| Guinea                           | 48.1         | 34.1   | 65.8    | 0.84                     | 0.60 | 1.15 | 17.3%                | -23.5% | 75.9%  |
| Guinea-Bissau                    | 11.5         | 8.3    | 15.5    | 1.21                     | 0.88 | 1.64 | 2.5%                 | -33.3% | 55.8%  |
| Guyana                           | 12.3         | 9.0    | 16.5    | 2.96                     | 2.16 | 3.97 | 76.6%                | 24.3%  | 149.4% |
| Haiti                            | 105.5        | 68.6   | 154.2   | 1.61                     | 1.05 | 2.35 | -2.9%                | -38.6% | 48.1%  |
| Honduras                         | 49.7         | 29.7   | 76.2    | 0.96                     | 0.57 | 1.47 | 3.7%                 | -38.2% | 66.2%  |
| Hungary                          | 187.2        | 146.1  | 236.2   | 4.22                     | 3.29 | 5.32 | -10.9%               | -30.1% | 13.3%  |
| Iceland                          | 2.1          | 1.8    | 2.5     | 1.31                     | 1.11 | 1.53 | -11.6%               | -28.3% | 7.1%   |
| India                            | 9962.0       | 8305.9 | 11871.9 | 1.31                     | 1.09 | 1.56 | 38.1%                | 9.2%   | 68.0%  |
| Indonesia                        | 4190.4       | 2996.4 | 5533.4  | 2.93                     | 2.10 | 3.88 | 71.5%                | 28.5%  | 130.1% |
| Iran                             | 829.9        | 769.4  | 899.6   | 1.76                     | 1.63 | 1.90 | 68.4%                | 32.4%  | 110.7% |
| Iraq                             | 350.6        | 252.0  | 492.8   | 1.52                     | 1.09 | 2.13 | 33.2%                | -21.5% | 122.8% |
| Ireland                          | 45.4         | 38.8   | 52.9    | 1.95                     | 1.67 | 2.27 | -26.9%               | -38.6% | -13.5% |
| Israel                           | 83.5         | 74.1   | 93.9    | 1.91                     | 1.69 | 2.15 | -8.9%                | -20.6% | 4.4%   |
| Italy                            | 595.0        | 558.1  | 628.7   | 2.35                     | 2.20 | 2.48 | -11.9%               | -17.3% | -6.5%  |
| Jamaica                          | 41.2         | 30.5   | 54.8    | 2.69                     | 1.99 | 3.58 | 204.3%               | 119.6% | 311.5% |
| Japan                            | 1426.9       | 1342.3 | 1480.2  | 2.76                     | 2.59 | 2.86 | -20.3%               | -24.3% | -17.2% |
| Jordan                           | 113.4        | 92.2   | 139.8   | 1.79                     | 1.45 | 2.21 | 18.5%                | -13.8% | 58.3%  |
| Kazakhstan                       | 196.6        | 162.5  | 233.8   | 2.12                     | 1.75 | 2.52 | -22.4%               | -35.5% | -6.8%  |
| Kenya                            | 278.3        | 211.6  | 356.9   | 1.07                     | 0.81 | 1.37 | 82.9%                | 35.4%  | 145.0% |
| Kiribati                         | 1.5          | 1.1    | 2.1     | 2.56                     | 1.86 | 3.47 | 0.6%                 | -32.5% | 51.7%  |
| Kuwait                           | 33.0         | 26.6   | 40.9    | 1.13                     | 0.92 | 1.41 | 35.2%                | 7.6%   | 72.6%  |
| Kyrgyzstan                       | 42.3         | 35.5   | 49.9    | 1.26                     | 1.06 | 1.48 | -45.7%               | -55.6% | -34.1% |
| Lao People's Democratic Republic | 96.7         | 62.7   | 134.1   | 2.48                     | 1.61 | 3.44 | 18.8%                | -25.3% | 102.1% |
| Latvia                           | 20.4         | 15.9   | 26.3    | 2.49                     | 1.94 | 3.20 | -22.7%               | -40.5% | -0.5%  |
| Lebanon                          | 67.7         | 49.8   | 88.9    | 2.53                     | 1.86 | 3.33 | 29.0%                | -20.2% | 98.8%  |
| Lesotho                          | 19.5         | 12.2   | 28.2    | 1.70                     | 1.07 | 2.46 | 146.9%               | 33.8%  | 320.5% |
| Liberia                          | 20.6         | 12.3   | 31.3    | 0.83                     | 0.50 | 1.27 | -3.1%                | -42.1% | 47.6%  |
| Libya                            | 114.7        | 79.6   | 160.7   | 2.79                     | 1.94 | 3.91 | 54.4%                | -16.8% | 167.9% |

| Country                          | 2019         |        |        |                          |      |      | Change of death rate |        |        |
|----------------------------------|--------------|--------|--------|--------------------------|------|------|----------------------|--------|--------|
|                                  | Death number |        |        | Death rate (per 100 000) |      |      | 2019 versus 1990     |        |        |
|                                  | Value        | LUI    | UII    | Value                    | LUI  | UII  | Value                | LUI    | UII    |
| Lithuania                        | 30.4         | 23.3   | 38.8   | 2.51                     | 1.92 | 3.20 | -15.8%               | -35.5% | 6.7%   |
| Luxembourg                       | 5.4          | 4.7    | 6.3    | 1.77                     | 1.52 | 2.05 | -42.4%               | -52.3% | -30.9% |
| Madagascar                       | 151.4        | 103.3  | 211.9  | 1.15                     | 0.78 | 1.60 | -2.6%                | -37.3% | 45.2%  |
| Malawi                           | 63.3         | 41.7   | 91.7   | 0.70                     | 0.46 | 1.02 | 17.3%                | -25.8% | 82.0%  |
| Malaysia                         | 442.0        | 314.7  | 591.7  | 2.53                     | 1.80 | 3.39 | 28.7%                | -11.7% | 84.1%  |
| Maldives                         | 3.1          | 2.5    | 3.9    | 0.99                     | 0.78 | 1.24 | -11.7%               | -43.9% | 64.5%  |
| Mali                             | 86.9         | 60.1   | 118.7  | 0.90                     | 0.62 | 1.23 | -2.1%                | -33.3% | 43.3%  |
| Malta                            | 3.4          | 2.9    | 4.0    | 1.73                     | 1.45 | 2.04 | 4.9%                 | -14.8% | 28.4%  |
| Marshall Islands                 | 0.9          | 0.6    | 1.2    | 2.86                     | 1.91 | 3.97 | 60.3%                | 7.2%   | 126.1% |
| Mauritania                       | 15.0         | 9.7    | 21.8   | 0.77                     | 0.50 | 1.13 | -19.4%               | -52.1% | 37.6%  |
| Mauritius                        | 16.1         | 12.5   | 20.5   | 2.48                     | 1.92 | 3.16 | 98.6%                | 49.6%  | 158.9% |
| Mexico                           | 1334.6       | 1131.1 | 1553.6 | 2.01                     | 1.71 | 2.34 | 109.0%               | 77.2%  | 144.9% |
| Micronesia                       | 1.5          | 0.5    | 2.2    | 2.74                     | 0.90 | 4.13 | 21.9%                | -60.3% | 93.0%  |
| Monaco                           | 0.5          | 0.4    | 0.7    | 3.60                     | 2.65 | 5.01 | 3.5%                 | -30.7% | 55.3%  |
| Mongolia                         | 37.6         | 27.6   | 50.9   | 2.08                     | 1.52 | 2.82 | 55.4%                | 8.4%   | 122.9% |
| Montenegro                       | 6.9          | 5.5    | 8.5    | 2.34                     | 1.86 | 2.88 | 9.2%                 | -17.8% | 42.2%  |
| Morocco                          | 252.3        | 174.3  | 383.0  | 1.32                     | 0.91 | 2.00 | 50.6%                | -4.1%  | 138.0% |
| Mozambique                       | 132.2        | 83.3   | 192.3  | 0.99                     | 0.63 | 1.44 | 59.8%                | 0.7%   | 147.1% |
| Myanmar                          | 787.0        | 531.8  | 1105.6 | 2.72                     | 1.84 | 3.82 | 42.5%                | -11.6% | 121.5% |
| Namibia                          | 13.7         | 8.5    | 20.8   | 1.09                     | 0.68 | 1.66 | 56.3%                | -10.9% | 178.4% |
| Nauru                            | 0.2          | 0.1    | 0.3    | 3.64                     | 2.07 | 5.01 | -7.3%                | -37.5% | 35.8%  |
| Nepal                            | 118.1        | 77.0   | 172.2  | 0.73                     | 0.48 | 1.06 | 9.4%                 | -35.4% | 77.8%  |
| Netherlands                      | 181.4        | 160.4  | 204.0  | 2.42                     | 2.14 | 2.72 | -7.5%                | -19.3% | 5.5%   |
| New Zealand                      | 54.9         | 49.5   | 61.2   | 2.77                     | 2.49 | 3.08 | -21.9%               | -31.9% | -10.2% |
| Nicaragua                        | 44.2         | 33.4   | 56.2   | 1.26                     | 0.95 | 1.60 | 41.9%                | 0.0%   | 95.2%  |
| Niger                            | 52.6         | 34.7   | 78.4   | 0.55                     | 0.37 | 0.83 | -16.9%               | -44.7% | 20.6%  |
| Nigeria                          | 748.3        | 514.4  | 1052.5 | 0.74                     | 0.51 | 1.04 | 18.4%                | -21.5% | 84.8%  |
| Niue                             | 0.0          | 0.0    | 0.0    | 2.77                     | 1.62 | 4.32 | 8.9%                 | -40.2% | 82.1%  |
| North Macedonia                  | 36.9         | 28.1   | 48.3   | 3.40                     | 2.60 | 4.45 | 34.0%                | 0.4%   | 78.9%  |
| Northern Mariana Islands         | 0.8          | 0.6    | 1.1    | 3.83                     | 2.70 | 5.20 | 12.2%                | -32.4% | 84.8%  |
| Norway                           | 53.8         | 48.9   | 57.5   | 2.16                     | 1.96 | 2.31 | -22.7%               | -29.7% | -17.0% |
| Oman                             | 25.0         | 18.5   | 36.9   | 0.80                     | 0.59 | 1.18 | -3.9%                | -45.1% | 56.9%  |
| Pakistan                         | 1732.1       | 1336.3 | 2215.2 | 1.55                     | 1.20 | 1.98 | 69.9%                | 22.5%  | 139.2% |
| Palau                            | 0.3          | 0.2    | 0.4    | 2.79                     | 1.91 | 3.81 | 43.8%                | -12.6% | 130.8% |
| Palestine                        | 57.0         | 46.4   | 68.4   | 2.25                     | 1.83 | 2.69 | 17.2%                | -22.9% | 85.6%  |
| Panama                           | 38.9         | 27.7   | 51.6   | 1.85                     | 1.32 | 2.45 | 59.6%                | 12.0%  | 117.0% |
| Papua New Guinea                 | 73.0         | 50.4   | 102.7  | 1.44                     | 0.99 | 2.02 | 27.3%                | -10.1% | 85.6%  |
| Paraguay                         | 72.0         | 51.5   | 97.4   | 1.94                     | 1.39 | 2.62 | 107.5%               | 41.9%  | 196.5% |
| Peru                             | 266.5        | 188.2  | 371.1  | 1.50                     | 1.06 | 2.08 | 33.9%                | -10.0% | 95.1%  |
| Philippines                      | 2015.4       | 1636.9 | 2510.6 | 3.45                     | 2.80 | 4.29 | 23.1%                | -3.6%  | 57.3%  |
| Poland                           | 567.8        | 462.7  | 678.9  | 3.12                     | 2.54 | 3.73 | -2.7%                | -21.0% | 15.7%  |
| Portugal                         | 156.6        | 137.9  | 177.4  | 3.34                     | 2.94 | 3.78 | 9.7%                 | -4.9%  | 26.6%  |
| Puerto Rico                      | 49.2         | 35.4   | 67.0   | 3.10                     | 2.23 | 4.23 | 37.8%                | -2.1%  | 91.6%  |
| Qatar                            | 20.2         | 14.6   | 27.4   | 0.93                     | 0.68 | 1.27 | -4.4%                | -40.5% | 47.5%  |
| Republic of Korea                | 567.8        | 497.6  | 646.2  | 2.18                     | 1.91 | 2.48 | 6.3%                 | -8.5%  | 24.6%  |
| Republic of Moldova              | 59.5         | 49.3   | 70.4   | 3.24                     | 2.69 | 3.83 | -17.4%               | -31.7% | -1.5%  |
| Romania                          | 359.2        | 285.9  | 452.1  | 4.15                     | 3.30 | 5.22 | 45.5%                | 14.6%  | 83.1%  |
| Russian Federation               | 2240.2       | 1883.2 | 2619.9 | 3.27                     | 2.75 | 3.83 | 30.2%                | 11.1%  | 51.5%  |
| Rwanda                           | 79.1         | 52.8   | 114.6  | 1.22                     | 0.82 | 1.77 | -8.2%                | -46.7% | 76.4%  |
| Saint Kitts and Nevis            | 0.7          | 0.2    | 1.1    | 2.17                     | 0.73 | 3.40 | -5.7%                | -67.9% | 49.9%  |
| Saint Lucia                      | 2.2          | 1.7    | 2.7    | 2.32                     | 1.87 | 2.84 | 56.5%                | 22.9%  | 94.9%  |
| Saint Vincent and the Grenadines | 1.6          | 1.3    | 1.9    | 2.76                     | 2.27 | 3.32 | 90.6%                | 52.7%  | 132.9% |

| Country                      | 2019         |        |        |                          |      |      | Change of death rate |        |        |
|------------------------------|--------------|--------|--------|--------------------------|------|------|----------------------|--------|--------|
|                              | Death number |        |        | Death rate (per 100 000) |      |      | 2019 versus 1990     |        |        |
|                              | Value        | LUI    | UII    | Value                    | LUI  | UII  | Value                | LUI    | UII    |
| Samoa                        | 1.7          | 1.1    | 2.4    | 1.64                     | 1.02 | 2.35 | 28.3%                | -23.8% | 112.3% |
| San Marino                   | 0.4          | 0.2    | 0.6    | 2.43                     | 1.44 | 4.00 | 20.2%                | -33.0% | 116.2% |
| Sao Tome and Principe        | 1.8          | 1.1    | 2.6    | 1.67                     | 1.05 | 2.47 | 81.9%                | 8.2%   | 213.6% |
| Saudi Arabia                 | 495.1        | 357.0  | 685.8  | 2.03                     | 1.47 | 2.82 | 116.1%               | 23.1%  | 278.4% |
| Senegal                      | 69.3         | 45.0   | 96.4   | 0.94                     | 0.61 | 1.31 | 9.2%                 | -30.4% | 62.5%  |
| Serbia                       | 152.9        | 115.6  | 198.8  | 3.82                     | 2.89 | 4.97 | -0.1%                | -29.0% | 39.2%  |
| Seychelles                   | 2.8          | 2.3    | 3.4    | 5.14                     | 4.22 | 6.21 | 103.9%               | 61.1%  | 158.6% |
| Sierra Leone                 | 32.8         | 22.2   | 46.1   | 0.79                     | 0.53 | 1.11 | 12.2%                | -27.5% | 70.3%  |
| Singapore                    | 50.4         | 44.3   | 57.1   | 1.64                     | 1.44 | 1.86 | -42.3%               | -50.4% | -33.1% |
| Slovakia                     | 94.4         | 68.5   | 126.5  | 3.59                     | 2.60 | 4.81 | -2.4%                | -29.4% | 33.3%  |
| Slovenia                     | 21.5         | 15.6   | 28.8   | 2.40                     | 1.74 | 3.21 | -18.6%               | -47.8% | 23.3%  |
| Solomon Islands              | 9.7          | 5.3    | 13.7   | 2.95                     | 1.62 | 4.16 | 43.2%                | -4.2%  | 105.3% |
| Somalia                      | 74.7         | 44.1   | 142.0  | 0.79                     | 0.47 | 1.50 | -12.4%               | -48.2% | 46.2%  |
| South Africa                 | 509.9        | 439.6  | 590.6  | 1.67                     | 1.44 | 1.94 | -5.7%                | -23.1% | 16.8%  |
| South Sudan                  | 56.5         | 32.7   | 94.4   | 1.34                     | 0.78 | 2.24 | 15.5%                | -29.2% | 98.6%  |
| Spain                        | 535.5        | 477.7  | 600.6  | 2.59                     | 2.31 | 2.91 | 1.2%                 | -11.6% | 14.7%  |
| Sri Lanka                    | 117.1        | 83.2   | 162.6  | 1.07                     | 0.76 | 1.49 | 27.0%                | -14.7% | 83.5%  |
| Sudan                        | 229.6        | 134.0  | 359.9  | 1.10                     | 0.64 | 1.73 | 28.1%                | -27.8% | 113.2% |
| Suriname                     | 8.7          | 6.8    | 11.0   | 3.03                     | 2.36 | 3.82 | 70.7%                | 28.5%  | 137.2% |
| Sweden                       | 89.5         | 81.1   | 98.2   | 2.00                     | 1.81 | 2.19 | -16.2%               | -25.4% | -7.0%  |
| Switzerland                  | 60.6         | 53.0   | 68.6   | 1.52                     | 1.33 | 1.72 | -19.3%               | -30.9% | -7.0%  |
| Syrian Arab Republic         | 87.9         | 63.3   | 122.8  | 1.18                     | 0.85 | 1.65 | 6.6%                 | -33.5% | 70.2%  |
| Tajikistan                   | 92.4         | 71.2   | 118.4  | 1.86                     | 1.43 | 2.38 | -29.1%               | -46.4% | -8.4%  |
| Thailand                     | 964.8        | 679.9  | 1314.7 | 2.70                     | 1.91 | 3.68 | 38.0%                | -4.3%  | 100.6% |
| Timor-Leste                  | 11.2         | 3.5    | 16.3   | 1.72                     | 0.54 | 2.50 | 39.1%                | -65.4% | 135.7% |
| Togo                         | 40.2         | 25.6   | 57.5   | 1.02                     | 0.65 | 1.46 | 26.6%                | -18.1% | 84.0%  |
| Tokelau                      | 0.0          | 0.0    | 0.0    | 2.23                     | 1.28 | 3.33 | 27.2%                | -27.8% | 104.4% |
| Tonga                        | 0.5          | 0.4    | 0.7    | 1.05                     | 0.73 | 1.49 | 34.0%                | -12.5% | 103.0% |
| Trinidad and Tobago          | 19.4         | 13.5   | 26.6   | 2.79                     | 1.94 | 3.82 | 29.3%                | -9.7%  | 78.3%  |
| Tunisia                      | 96.0         | 66.6   | 133.3  | 1.59                     | 1.10 | 2.21 | 73.7%                | 10.3%  | 159.7% |
| Turkey                       | 1022.2       | 799.7  | 1297.6 | 2.24                     | 1.75 | 2.84 | -9.0%                | -37.0% | 30.9%  |
| Turkmenistan                 | 42.7         | 33.4   | 55.6   | 1.62                     | 1.27 | 2.11 | -14.1%               | -33.4% | 12.6%  |
| Tuvalu                       | 0.1          | 0.1    | 0.2    | 2.31                     | 1.51 | 3.27 | 6.9%                 | -30.5% | 59.6%  |
| Uganda                       | 282.4        | 199.2  | 393.4  | 1.50                     | 1.05 | 2.08 | 104.4%               | 31.4%  | 228.9% |
| Ukraine                      | 975.6        | 796.4  | 1203.8 | 4.69                     | 3.83 | 5.79 | -7.5%                | -25.7% | 15.3%  |
| United Arab Emirates         | 153.9        | 102.6  | 217.5  | 2.21                     | 1.47 | 3.12 | 61.5%                | -13.1% | 189.9% |
| United Kingdom               | 707.6        | 686.7  | 728.6  | 2.32                     | 2.25 | 2.39 | -15.4%               | -18.5% | -12.5% |
| United Republic of Tanzania  | 352.0        | 237.3  | 517.4  | 1.32                     | 0.89 | 1.94 | 34.8%                | -9.2%  | 97.3%  |
| United States of America     | 4180.7       | 4040.5 | 4334.6 | 2.78                     | 2.68 | 2.88 | 14.0%                | 9.0%   | 20.5%  |
| United States Virgin Islands | 1.9          | 1.4    | 2.7    | 4.38                     | 3.16 | 6.20 | 29.2%                | -12.1% | 90.6%  |
| Uruguay                      | 55.4         | 49.2   | 62.1   | 3.36                     | 2.99 | 3.77 | -2.6%                | -16.8% | 13.1%  |
| Uzbekistan                   | 316.0        | 262.6  | 379.4  | 1.75                     | 1.45 | 2.10 | -2.4%                | -19.6% | 18.7%  |
| Vanuatu                      | 2.8          | 1.8    | 4.0    | 1.91                     | 1.22 | 2.73 | 39.8%                | -16.1% | 124.6% |
| Venezuela                    | 313.3        | 227.1  | 421.9  | 2.18                     | 1.58 | 2.93 | 71.9%                | 24.3%  | 134.0% |
| Viet Nam                     | 1676.0       | 1192.4 | 2318.0 | 3.16                     | 2.25 | 4.37 | 188.7%               | 81.1%  | 350.5% |
| Yemen                        | 160.6        | 104.7  | 231.7  | 1.03                     | 0.67 | 1.48 | 26.2%                | -29.1% | 130.2% |
| Zambia                       | 171.9        | 114.3  | 244.2  | 1.90                     | 1.27 | 2.71 | 37.0%                | -14.2% | 108.2% |
| Zimbabwe                     | 151.0        | 101.5  | 211.3  | 2.01                     | 1.35 | 2.81 | 100.2%               | 27.6%  | 193.0% |

95% UI, 95% uncertainty intervals; LUI, lower uncertainty interval; UII, upper uncertainty interval.



**Table S3.** Disability-adjusted life-years of early-onset colorectal cancer in 203 countries.

| Country                               | 2019      |           |           |                         |       |       | Change of death rate |        |        |
|---------------------------------------|-----------|-----------|-----------|-------------------------|-------|-------|----------------------|--------|--------|
|                                       | DALYs     |           |           | DALY rate (per 100 000) |       |       | 2019 versus 1990     |        |        |
|                                       | Value     | LUI       | UII       | Value                   | LUI   | UII   | Value                | LUI    | UII    |
| Afghanistan                           | 14642.9   | 8054.7    | 22403.6   | 80.5                    | 44.3  | 123.1 | -3.4%                | -38.5% | 72.7%  |
| Albania                               | 1242.7    | 910.4     | 1671.5    | 96.1                    | 70.4  | 129.2 | 25.7%                | -9.4%  | 69.5%  |
| Algeria                               | 14044.3   | 10390.5   | 18610.9   | 62.6                    | 46.3  | 83.0  | 24.4%                | -15.4% | 75.0%  |
| American Samoa                        | 41.1      | 29.9      | 55.7      | 149.5                   | 108.8 | 202.9 | 26.3%                | -14.4% | 83.5%  |
| Andorra                               | 67.3      | 47.1      | 92.1      | 164.2                   | 115.1 | 224.9 | 13.6%                | -31.0% | 77.2%  |
| Angola                                | 8617.3    | 5632.6    | 11830.0   | 63.7                    | 41.6  | 87.4  | 13.0%                | -31.9% | 81.7%  |
| Antigua and Barbuda                   | 42.5      | 34.6      | 53.2      | 89.0                    | 72.5  | 111.3 | 25.2%                | -1.7%  | 57.3%  |
| Argentina                             | 38318.2   | 34748.7   | 42351.9   | 165.2                   | 149.8 | 182.6 | 25.7%                | 11.7%  | 40.9%  |
| Armenia                               | 1688.9    | 1377.7    | 2025.6    | 114.3                   | 93.2  | 137.1 | -20.1%               | -35.3% | -2.5%  |
| Australia                             | 14079.7   | 12594.1   | 15714.2   | 122.0                   | 109.1 | 136.2 | -11.8%               | -21.5% | -1.1%  |
| Austria                               | 3004.4    | 2649.8    | 3394.4    | 74.5                    | 65.7  | 84.1  | -57.0%               | -62.5% | -50.7% |
| Azerbaijan                            | 8127.7    | 6419.8    | 10163.5   | 146.1                   | 115.4 | 182.7 | -10.1%               | -29.6% | 13.5%  |
| Bahamas                               | 403.2     | 314.9     | 513.4     | 196.9                   | 153.8 | 250.8 | 42.8%                | 8.4%   | 85.8%  |
| Bahrain                               | 773.5     | 571.9     | 1001.4    | 83.7                    | 61.9  | 108.3 | 36.2%                | -3.8%  | 88.4%  |
| Bangladesh                            | 29420.3   | 18952.7   | 43585.7   | 34.1                    | 22.0  | 50.6  | 7.9%                 | -35.6% | 85.9%  |
| Barbados                              | 246.3     | 196.7     | 309.6     | 175.7                   | 140.3 | 220.8 | 37.4%                | 7.7%   | 75.1%  |
| Belarus                               | 5727.2    | 4258.2    | 7729.7    | 131.4                   | 97.7  | 177.4 | -23.7%               | -43.5% | 2.4%   |
| Belgium                               | 4494.2    | 3960.3    | 5030.8    | 89.7                    | 79.1  | 100.4 | -27.4%               | -36.6% | -17.4% |
| Belize                                | 197.8     | 167.5     | 235.1     | 88.1                    | 74.6  | 104.8 | 161.2%               | 112.5% | 232.5% |
| Benin                                 | 2444.8    | 1656.9    | 3452.2    | 42.0                    | 28.5  | 59.3  | 15.3%                | -24.1% | 69.8%  |
| Bermuda                               | 38.3      | 29.8      | 49.3      | 138.1                   | 107.5 | 177.6 | -8.2%                | -31.7% | 20.7%  |
| Bhutan                                | 185.8     | 92.6      | 285.7     | 42.7                    | 21.3  | 65.6  | 35.5%                | -21.6% | 148.7% |
| Bolivia                               | 4427.8    | 2911.8    | 6260.2    | 72.5                    | 47.7  | 102.5 | 22.7%                | -24.4% | 90.3%  |
| Bosnia and Herzegovina                | 2793.2    | 2151.9    | 3593.5    | 184.0                   | 141.8 | 236.7 | 52.5%                | 13.5%  | 102.6% |
| Botswana                              | 1568.2    | 914.3     | 2396.3    | 118.5                   | 69.1  | 181.2 | 93.0%                | 7.2%   | 225.2% |
| Brazil                                | 135880.6  | 128375.5  | 142679.1  | 117.7                   | 111.2 | 123.5 | 46.8%                | 37.3%  | 55.9%  |
| Brunei Darussalam                     | 548.9     | 452.3     | 660.4     | 206.3                   | 170.0 | 248.2 | 19.1%                | -12.1% | 55.7%  |
| Bulgaria                              | 7358.1    | 5565.1    | 9567.1    | 242.8                   | 183.7 | 315.7 | 12.4%                | -15.9% | 49.2%  |
| Burkina Faso                          | 4347.1    | 3030.2    | 5927.0    | 42.5                    | 29.6  | 57.9  | 27.7%                | -13.9% | 80.3%  |
| Burundi                               | 2797.8    | 1884.3    | 4084.5    | 51.0                    | 34.4  | 74.5  | -15.4%               | -48.4% | 48.7%  |
| Cabo Verde                            | 182.9     | 133.6     | 246.3     | 59.4                    | 43.4  | 80.0  | 70.1%                | 22.5%  | 142.5% |
| Cambodia                              | 10698.4   | 8105.1    | 14364.9   | 121.8                   | 92.2  | 163.5 | 50.7%                | -2.2%  | 144.0% |
| Cameroon                              | 9041.2    | 5886.5    | 13200.5   | 62.9                    | 40.9  | 91.8  | 14.5%                | -29.8% | 77.4%  |
| Canada                                | 18009.5   | 16063.4   | 20178.6   | 111.4                   | 99.3  | 124.8 | -1.7%                | -13.3% | 11.6%  |
| Central African Republic              | 1313.7    | 877.9     | 1960.2    | 51.3                    | 34.3  | 76.5  | -5.7%                | -38.2% | 44.8%  |
| Chad                                  | 2662.1    | 1865.8    | 3658.5    | 38.9                    | 27.3  | 53.5  | 25.7%                | -12.7% | 84.8%  |
| Chile                                 | 9026.8    | 7990.3    | 10129.7   | 98.2                    | 86.9  | 110.2 | 39.8%                | 21.2%  | 60.4%  |
| China                                 | 1304828.1 | 1099584.6 | 1526715.0 | 181.0                   | 152.6 | 211.8 | 59.1%                | 27.3%  | 98.9%  |
| Colombia                              | 24888.1   | 18457.8   | 32920.0   | 99.9                    | 74.1  | 132.2 | 46.6%                | 9.3%   | 93.4%  |
| Comoros                               | 255.3     | 145.7     | 366.9     | 68.3                    | 39.0  | 98.2  | 38.1%                | -29.7% | 413.0% |
| Congo                                 | 2333.9    | 1450.2    | 3450.4    | 87.2                    | 54.2  | 128.9 | 5.9%                 | -39.0% | 91.6%  |
| Cook Islands                          | 6.1       | 3.6       | 8.4       | 74.9                    | 44.2  | 103.2 | 14.3%                | -36.3% | 89.0%  |
| Costa Rica                            | 3482.8    | 2641.3    | 4566.3    | 139.6                   | 105.8 | 183.0 | 116.1%               | 57.2%  | 187.4% |
| Croatia                               | 2871.9    | 2138.7    | 3768.1    | 154.1                   | 114.8 | 202.2 | -3.0%                | -29.4% | 29.1%  |
| Cuba                                  | 6651.3    | 5171.3    | 8283.7    | 125.3                   | 97.4  | 156.1 | 25.5%                | -2.5%  | 59.2%  |
| Cyprus                                | 490.8     | 404.5     | 589.1     | 71.2                    | 58.7  | 85.4  | 21.6%                | -7.0%  | 53.4%  |
| Czechia                               | 6507.0    | 5022.1    | 8286.8    | 135.5                   | 104.6 | 172.6 | -39.9%               | -54.7% | -22.1% |
| Cote d'Ivoire                         | 7388.9    | 4950.3    | 10234.5   | 56.6                    | 37.9  | 78.4  | 9.3%                 | -31.4% | 61.4%  |
| Democratic People's Republic of Korea | 23038.1   | 14564.4   | 35287.0   | 165.6                   | 104.7 | 253.6 | 8.7%                 | -38.9% | 86.2%  |
| Democratic Republic of the Congo      | 16107.7   | 10269.0   | 24066.8   | 38.6                    | 24.6  | 57.7  | -5.1%                | -44.1% | 46.5%  |
| Denmark                               | 2607.0    | 2305.3    | 2923.8    | 101.7                   | 89.9  | 114.1 | -30.4%               | -39.8% | -20.7% |

| Country                          | 2019     |          |          |                         |       |       | Change of death rate |        |        |
|----------------------------------|----------|----------|----------|-------------------------|-------|-------|----------------------|--------|--------|
|                                  | DALYs    |          |          | DALY rate (per 100 000) |       |       | 2019 versus 1990     |        |        |
|                                  | Value    | LUI      | UII      | Value                   | LUI   | UII   | Value                | LUI    | UII    |
| Djibouti                         | 565.0    | 328.2    | 881.6    | 88.0                    | 51.1  | 137.3 | 68.1%                | -4.9%  | 184.4% |
| Dominica                         | 38.2     | 29.1     | 49.8     | 112.4                   | 85.6  | 146.7 | 45.2%                | 3.4%   | 99.3%  |
| Dominican Republic               | 6935.7   | 4732.7   | 9616.9   | 120.2                   | 82.0  | 166.7 | 107.4%               | 40.5%  | 191.8% |
| Ecuador                          | 8665.7   | 6567.9   | 11356.7  | 94.3                    | 71.4  | 123.5 | 86.6%                | 37.4%  | 145.1% |
| Egypt                            | 38136.3  | 26799.8  | 52842.6  | 74.2                    | 52.1  | 102.8 | 22.6%                | -15.1% | 71.1%  |
| El Salvador                      | 3284.0   | 2381.7   | 4440.6   | 100.1                   | 72.6  | 135.3 | 110.2%               | 48.0%  | 186.1% |
| Equatorial Guinea                | 530.0    | 292.1    | 894.9    | 70.8                    | 39.0  | 119.6 | 46.4%                | -27.5% | 169.6% |
| Eritrea                          | 2718.3   | 1828.1   | 3963.3   | 78.7                    | 52.9  | 114.7 | 51.3%                | -6.3%  | 148.8% |
| Estonia                          | 706.0    | 521.3    | 931.0    | 121.4                   | 89.6  | 160.0 | -17.7%               | -40.9% | 10.0%  |
| Eswatini                         | 592.3    | 336.4    | 916.6    | 97.8                    | 55.5  | 151.3 | 81.0%                | 4.9%   | 194.0% |
| Ethiopia                         | 26008.1  | 18947.9  | 35863.0  | 49.5                    | 36.1  | 68.3  | -26.3%               | -52.3% | 42.0%  |
| Fiji                             | 481.0    | 360.7    | 633.7    | 103.2                   | 77.4  | 135.9 | 28.0%                | -13.0% | 90.9%  |
| Finland                          | 1690.1   | 1476.9   | 1926.5   | 72.4                    | 63.3  | 82.5  | -28.5%               | -39.6% | -17.1% |
| France                           | 28271.0  | 24833.6  | 31888.6  | 99.4                    | 87.3  | 112.2 | -13.9%               | -25.2% | -2.0%  |
| Gabon                            | 908.4    | 581.7    | 1315.4   | 98.3                    | 63.0  | 142.4 | 5.4%                 | -40.3% | 79.9%  |
| Gambia                           | 378.2    | 250.3    | 544.5    | 33.9                    | 22.5  | 48.9  | 37.2%                | -20.6% | 124.7% |
| Georgia                          | 2858.1   | 2300.0   | 3494.0   | 172.8                   | 139.1 | 211.2 | 6.7%                 | -17.2% | 33.6%  |
| Germany                          | 38544.2  | 34663.8  | 42954.5  | 107.4                   | 96.6  | 119.7 | -21.5%               | -30.3% | -11.9% |
| Ghana                            | 11094.1  | 7631.8   | 15219.5  | 66.8                    | 46.0  | 91.6  | 42.3%                | -5.2%  | 117.8% |
| Greece                           | 4486.9   | 4046.6   | 4950.8   | 100.4                   | 90.5  | 110.7 | 35.8%                | 20.4%  | 51.8%  |
| Greenland                        | 57.4     | 44.2     | 76.2     | 215.8                   | 166.1 | 286.6 | -2.3%                | -30.2% | 41.0%  |
| Grenada                          | 71.1     | 57.8     | 86.5     | 131.2                   | 106.6 | 159.8 | 40.1%                | 9.7%   | 76.3%  |
| Guam                             | 142.9    | 114.5    | 178.0    | 176.1                   | 141.2 | 219.5 | 54.9%                | 14.8%  | 109.0% |
| Guatemala                        | 8206.9   | 6305.8   | 10557.2  | 85.8                    | 65.9  | 110.3 | 98.1%                | 48.0%  | 165.2% |
| Guinea                           | 2406.5   | 1709.7   | 3274.5   | 42.1                    | 29.9  | 57.2  | 19.1%                | -21.5% | 76.2%  |
| Guinea-Bissau                    | 574.4    | 423.1    | 775.2    | 60.7                    | 44.7  | 81.9  | 3.7%                 | -31.9% | 55.8%  |
| Guyana                           | 605.3    | 443.7    | 811.3    | 146.0                   | 107.0 | 195.7 | 73.6%                | 23.3%  | 142.6% |
| Haiti                            | 5218.1   | 3407.2   | 7574.4   | 79.6                    | 52.0  | 115.6 | -3.7%                | -38.4% | 44.4%  |
| Honduras                         | 2433.5   | 1442.4   | 3729.3   | 47.0                    | 27.9  | 72.1  | -0.1%                | -41.2% | 63.4%  |
| Hungary                          | 8849.8   | 6925.5   | 11154.1  | 199.3                   | 156.0 | 251.2 | -12.2%               | -31.1% | 11.5%  |
| Iceland                          | 106.1    | 90.5     | 123.3    | 65.0                    | 55.4  | 75.5  | -11.7%               | -27.4% | 6.1%   |
| India                            | 485009.4 | 404896.5 | 574274.0 | 63.9                    | 53.3  | 75.6  | 36.5%                | 8.2%   | 65.3%  |
| Indonesia                        | 204752.7 | 146964.8 | 268911.1 | 143.4                   | 102.9 | 188.3 | 66.1%                | 25.3%  | 123.8% |
| Iran                             | 41486.0  | 38521.1  | 44988.9  | 87.8                    | 81.5  | 95.2  | 64.4%                | 29.4%  | 105.5% |
| Iraq                             | 17346.9  | 12509.5  | 24414.9  | 75.0                    | 54.1  | 105.6 | 33.1%                | -20.9% | 121.9% |
| Ireland                          | 2221.1   | 1908.0   | 2592.9   | 95.3                    | 81.8  | 111.2 | -25.1%               | -37.6% | -11.8% |
| Israel                           | 4102.5   | 3642.1   | 4616.2   | 93.7                    | 83.2  | 105.5 | -9.3%                | -20.6% | 3.8%   |
| Italy                            | 28751.0  | 26958.6  | 30462.3  | 113.4                   | 106.3 | 120.1 | -12.0%               | -17.3% | -6.8%  |
| Jamaica                          | 2034.9   | 1506.5   | 2682.7   | 132.9                   | 98.4  | 175.2 | 202.1%               | 118.8% | 306.4% |
| Japan                            | 69580.5  | 65208.5  | 72617.1  | 134.4                   | 126.0 | 140.3 | -19.3%               | -23.5% | -16.0% |
| Jordan                           | 5566.9   | 4519.2   | 6791.0   | 87.9                    | 71.3  | 107.2 | 17.6%                | -13.8% | 55.3%  |
| Kazakhstan                       | 9592.0   | 7935.1   | 11377.6  | 103.3                   | 85.5  | 122.6 | -25.2%               | -38.0% | -10.7% |
| Kenya                            | 13645.4  | 10381.9  | 17492.1  | 52.4                    | 39.9  | 67.2  | 79.4%                | 32.8%  | 140.3% |
| Kiribati                         | 78.7     | 57.6     | 106.0    | 130.2                   | 95.4  | 175.4 | 0.7%                 | -31.6% | 49.8%  |
| Kuwait                           | 1622.3   | 1314.6   | 2004.9   | 55.7                    | 45.2  | 68.9  | 32.7%                | 6.3%   | 68.3%  |
| Kyrgyzstan                       | 2133.6   | 1806.5   | 2497.8   | 63.5                    | 53.8  | 74.4  | -47.7%               | -57.1% | -37.1% |
| Lao People's Democratic Republic | 4850.6   | 3180.3   | 6736.8   | 124.5                   | 81.6  | 172.9 | 19.4%                | -23.4% | 103.1% |
| Latvia                           | 983.8    | 769.9    | 1265.3   | 120.1                   | 94.0  | 154.5 | -22.0%               | -40.0% | 0.6%   |
| Lebanon                          | 3341.6   | 2464.3   | 4387.1   | 125.1                   | 92.2  | 164.2 | 30.7%                | -18.6% | 99.8%  |
| Lesotho                          | 961.5    | 605.6    | 1378.6   | 83.8                    | 52.8  | 120.2 | 146.7%               | 33.8%  | 314.4% |
| Liberia                          | 1016.3   | 606.7    | 1529.0   | 41.1                    | 24.5  | 61.8  | -3.1%                | -42.0% | 46.9%  |
| Libya                            | 5507.9   | 3849.5   | 7630.1   | 134.1                   | 93.7  | 185.7 | 49.2%                | -19.5% | 156.5% |

| Country                          | 2019     |         |          |                         |       |       | Change of death rate |        |        |
|----------------------------------|----------|---------|----------|-------------------------|-------|-------|----------------------|--------|--------|
|                                  | DALYs    |         |          | DALY rate (per 100 000) |       |       | 2019 versus 1990     |        |        |
|                                  | Value    | LUI     | UII      | Value                   | LUI   | UII   | Value                | LUI    | UII    |
| Lithuania                        | 1460.2   | 1120.5  | 1862.1   | 120.5                   | 92.5  | 153.7 | -15.8%               | -35.4% | 6.6%   |
| Luxembourg                       | 267.9    | 230.5   | 310.4    | 87.3                    | 75.1  | 101.2 | -41.3%               | -51.1% | -30.5% |
| Madagascar                       | 7475.2   | 5142.8  | 10336.4  | 56.6                    | 38.9  | 78.3  | -5.3%                | -38.3% | 40.5%  |
| Malawi                           | 3156.3   | 2082.6  | 4556.3   | 35.1                    | 23.1  | 50.6  | 16.9%                | -25.9% | 84.4%  |
| Malaysia                         | 22003.6  | 15681.0 | 29308.5  | 126.0                   | 89.8  | 167.9 | 28.4%                | -11.4% | 80.4%  |
| Maldives                         | 157.0    | 123.7   | 197.1    | 49.3                    | 38.8  | 61.9  | -9.9%                | -42.6% | 67.0%  |
| Mali                             | 4329.9   | 3005.5  | 5886.8   | 44.8                    | 31.1  | 61.0  | -0.7%                | -31.6% | 43.3%  |
| Malta                            | 168.3    | 141.5   | 197.1    | 85.4                    | 71.8  | 100.0 | 7.2%                 | -12.3% | 30.0%  |
| Marshall Islands                 | 43.2     | 28.8    | 59.8     | 142.6                   | 95.1  | 197.5 | 54.7%                | 3.5%   | 117.7% |
| Mauritania                       | 742.9    | 478.0   | 1085.0   | 38.3                    | 24.7  | 56.0  | -19.5%               | -52.0% | 37.1%  |
| Mauritius                        | 786.5    | 610.9   | 994.7    | 121.0                   | 94.0  | 153.0 | 95.0%                | 48.1%  | 152.8% |
| Mexico                           | 66064.6  | 56182.8 | 76696.7  | 99.7                    | 84.8  | 115.7 | 101.4%               | 71.7%  | 135.5% |
| Micronesia                       | 73.5     | 26.4    | 110.9    | 137.1                   | 49.3  | 207.0 | 19.7%                | -59.2% | 87.6%  |
| Monaco                           | 24.9     | 18.3    | 34.6     | 175.0                   | 128.7 | 242.5 | 4.5%                 | -29.1% | 55.3%  |
| Mongolia                         | 1865.8   | 1376.0  | 2515.1   | 103.2                   | 76.1  | 139.1 | 52.2%                | 7.1%   | 115.8% |
| Montenegro                       | 336.9    | 267.7   | 412.3    | 113.9                   | 90.5  | 139.3 | 6.5%                 | -19.3% | 38.3%  |
| Morocco                          | 12098.5  | 8396.5  | 18505.5  | 63.1                    | 43.8  | 96.5  | 47.2%                | -6.6%  | 134.0% |
| Mozambique                       | 6489.5   | 4121.0  | 9349.9   | 48.7                    | 30.9  | 70.2  | 61.7%                | 2.6%   | 145.2% |
| Myanmar                          | 39025.3  | 26238.3 | 54700.6  | 135.0                   | 90.8  | 189.2 | 39.1%                | -14.2% | 114.1% |
| Namibia                          | 666.8    | 411.9   | 1019.2   | 53.1                    | 32.8  | 81.2  | 55.1%                | -11.2% | 177.2% |
| Nauru                            | 10.4     | 5.9     | 14.3     | 184.8                   | 105.6 | 254.7 | -6.6%                | -36.6% | 35.5%  |
| Nepal                            | 5739.3   | 3741.4  | 8364.8   | 35.5                    | 23.1  | 51.7  | 8.5%                 | -35.6% | 73.6%  |
| Netherlands                      | 8751.7   | 7726.2  | 9871.6   | 116.6                   | 102.9 | 131.5 | -7.3%                | -19.0% | 5.2%   |
| New Zealand                      | 2692.2   | 2431.3  | 2986.3   | 135.6                   | 122.5 | 150.4 | -20.4%               | -30.2% | -9.3%  |
| Nicaragua                        | 2221.3   | 1684.5  | 2814.4   | 63.4                    | 48.1  | 80.3  | 38.1%                | -2.0%  | 88.4%  |
| Niger                            | 2646.0   | 1746.3  | 3962.7   | 27.9                    | 18.4  | 41.8  | -15.3%               | -43.9% | 22.8%  |
| Nigeria                          | 36599.8  | 25172.7 | 51596.1  | 36.3                    | 25.0  | 51.1  | 18.8%                | -21.0% | 84.8%  |
| Niue                             | 1.0      | 0.6     | 1.6      | 136.2                   | 78.8  | 212.6 | 8.0%                 | -41.2% | 81.7%  |
| North Macedonia                  | 1766.5   | 1355.6  | 2303.3   | 163.0                   | 125.1 | 212.5 | 32.2%                | -0.3%  | 75.4%  |
| Northern Mariana Islands         | 37.5     | 26.9    | 50.6     | 182.9                   | 131.4 | 246.9 | 6.0%                 | -35.3% | 73.6%  |
| Norway                           | 2621.9   | 2381.3  | 2803.6   | 105.3                   | 95.6  | 112.5 | -22.2%               | -29.3% | -16.5% |
| Oman                             | 1272.1   | 939.5   | 1885.5   | 40.6                    | 30.0  | 60.2  | -1.2%                | -43.0% | 60.1%  |
| Pakistan                         | 85657.4  | 66731.7 | 108642.5 | 76.6                    | 59.7  | 97.2  | 71.8%                | 25.1%  | 140.1% |
| Palau                            | 12.4     | 8.6     | 16.7     | 133.4                   | 92.2  | 180.1 | 37.9%                | -15.3% | 118.9% |
| Palestine                        | 2822.0   | 2320.4  | 3361.5   | 111.3                   | 91.5  | 132.5 | 16.1%                | -23.1% | 82.8%  |
| Panama                           | 1914.3   | 1384.0  | 2523.5   | 91.1                    | 65.9  | 120.1 | 56.7%                | 10.6%  | 111.5% |
| Papua New Guinea                 | 3688.0   | 2570.4  | 5138.8   | 72.5                    | 50.6  | 101.1 | 26.1%                | -10.3% | 81.1%  |
| Paraguay                         | 3576.3   | 2574.5  | 4822.2   | 96.2                    | 69.2  | 129.7 | 104.6%               | 40.0%  | 188.3% |
| Peru                             | 13602.9  | 9765.4  | 18698.1  | 76.3                    | 54.8  | 104.9 | 33.7%                | -8.9%  | 93.9%  |
| Philippines                      | 100983.4 | 82568.9 | 124946.4 | 172.7                   | 141.2 | 213.7 | 20.4%                | -5.1%  | 53.0%  |
| Poland                           | 26932.7  | 22086.3 | 32028.5  | 148.0                   | 121.4 | 176.0 | -4.1%                | -21.7% | 13.6%  |
| Portugal                         | 7572.9   | 6645.9  | 8583.9   | 161.4                   | 141.7 | 183.0 | 7.7%                 | -6.4%  | 24.4%  |
| Puerto Rico                      | 2378.5   | 1718.7  | 3215.1   | 150.1                   | 108.4 | 202.9 | 37.2%                | -2.3%  | 88.7%  |
| Qatar                            | 1019.4   | 743.2   | 1372.8   | 47.2                    | 34.4  | 63.6  | -3.2%                | -39.5% | 50.0%  |
| Republic of Korea                | 27870.6  | 24461.3 | 31519.5  | 107.0                   | 93.9  | 121.0 | 4.1%                 | -9.9%  | 20.8%  |
| Republic of Moldova              | 2887.4   | 2412.6  | 3408.8   | 157.2                   | 131.3 | 185.6 | -18.6%               | -32.7% | -2.6%  |
| Romania                          | 17075.1  | 13622.0 | 21488.2  | 197.2                   | 157.3 | 248.2 | 41.3%                | 11.8%  | 76.4%  |
| Russian Federation               | 109286.1 | 92474.4 | 127281.9 | 159.6                   | 135.1 | 185.9 | 29.5%                | 11.0%  | 50.1%  |
| Rwanda                           | 3943.9   | 2635.6  | 5661.7   | 61.0                    | 40.7  | 87.5  | -9.0%                | -47.4% | 75.2%  |
| Saint Kitts and Nevis            | 32.6     | 10.9    | 51.3     | 103.6                   | 34.7  | 163.1 | -11.7%               | -70.1% | 42.0%  |
| Saint Lucia                      | 104.7    | 85.2    | 127.8    | 111.9                   | 91.0  | 136.5 | 51.9%                | 20.4%  | 88.0%  |
| Saint Vincent and the Grenadines | 75.8     | 62.9    | 91.2     | 132.6                   | 109.9 | 159.5 | 80.9%                | 45.3%  | 119.9% |

| Country                      | 2019     |          |          |                         |       |       | Change of death rate |        |        |
|------------------------------|----------|----------|----------|-------------------------|-------|-------|----------------------|--------|--------|
|                              | DALYs    |          |          | DALY rate (per 100 000) |       |       | 2019 versus 1990     |        |        |
|                              | Value    | LUI      | UII      | Value                   | LUI   | UII   | Value                | LUI    | UII    |
| Samoa                        | 83.0     | 51.2     | 118.6    | 79.8                    | 49.2  | 114.1 | 26.4%                | -26.5% | 108.7% |
| San Marino                   | 18.0     | 10.8     | 29.0     | 118.7                   | 71.3  | 191.7 | 20.7%                | -31.5% | 114.0% |
| Sao Tome and Principe        | 90.5     | 57.0     | 133.7    | 84.5                    | 53.3  | 124.9 | 81.9%                | 7.2%   | 220.1% |
| Saudi Arabia                 | 24229.2  | 17410.5  | 33729.2  | 99.5                    | 71.5  | 138.5 | 115.5%               | 23.8%  | 273.3% |
| Senegal                      | 3464.7   | 2240.9   | 4815.1   | 47.2                    | 30.5  | 65.6  | 9.4%                 | -29.8% | 63.4%  |
| Serbia                       | 7317.2   | 5546.6   | 9475.1   | 182.8                   | 138.6 | 236.7 | -1.4%                | -29.4% | 38.7%  |
| Seychelles                   | 134.9    | 112.2    | 161.7    | 249.0                   | 207.1 | 298.5 | 96.5%                | 56.7%  | 147.5% |
| Sierra Leone                 | 1648.0   | 1118.3   | 2285.9   | 39.7                    | 26.9  | 55.0  | 13.9%                | -25.8% | 73.3%  |
| Singapore                    | 2487.8   | 2187.1   | 2814.0   | 80.9                    | 71.1  | 91.5  | -42.4%               | -50.3% | -33.6% |
| Slovakia                     | 4525.2   | 3301.9   | 6059.9   | 172.0                   | 125.5 | 230.3 | -1.9%                | -28.8% | 32.4%  |
| Slovenia                     | 1040.4   | 757.7    | 1392.4   | 116.1                   | 84.6  | 155.4 | -18.0%               | -47.6% | 23.2%  |
| Solomon Islands              | 487.1    | 266.6    | 684.6    | 148.4                   | 81.2  | 208.5 | 41.6%                | -3.8%  | 100.4% |
| Somalia                      | 3659.4   | 2170.7   | 6949.4   | 38.7                    | 22.9  | 73.4  | -11.5%               | -47.5% | 45.0%  |
| South Africa                 | 25405.8  | 21885.2  | 29486.5  | 83.4                    | 71.9  | 96.8  | -7.0%                | -24.1% | 15.8%  |
| South Sudan                  | 2751.8   | 1591.9   | 4583.3   | 65.3                    | 37.8  | 108.7 | 13.6%                | -29.8% | 95.1%  |
| Spain                        | 25836.7  | 23036.6  | 29037.8  | 125.0                   | 111.5 | 140.5 | -0.8%                | -13.3% | 12.4%  |
| Sri Lanka                    | 5746.1   | 4103.9   | 7903.2   | 52.7                    | 37.6  | 72.5  | 23.9%                | -15.9% | 78.3%  |
| Sudan                        | 11416.6  | 6740.6   | 17876.5  | 54.8                    | 32.3  | 85.8  | 29.3%                | -27.2% | 115.3% |
| Suriname                     | 426.4    | 335.5    | 535.8    | 147.9                   | 116.4 | 185.9 | 66.1%                | 25.9%  | 133.6% |
| Sweden                       | 4359.0   | 3970.4   | 4769.0   | 97.4                    | 88.7  | 106.5 | -15.1%               | -24.2% | -6.0%  |
| Switzerland                  | 2977.6   | 2597.0   | 3354.4   | 74.6                    | 65.0  | 84.0  | -19.3%               | -30.7% | -7.4%  |
| Syrian Arab Republic         | 4341.9   | 3130.8   | 6022.0   | 58.5                    | 42.2  | 81.1  | 1.1%                 | -37.3% | 60.0%  |
| Tajikistan                   | 4835.0   | 3744.0   | 6160.2   | 97.3                    | 75.3  | 124.0 | -30.8%               | -47.4% | -11.2% |
| Thailand                     | 47154.6  | 33314.9  | 64019.9  | 132.1                   | 93.4  | 179.4 | 34.5%                | -6.2%  | 92.4%  |
| Timor-Leste                  | 563.2    | 179.9    | 816.1    | 86.3                    | 27.6  | 125.0 | 38.8%                | -65.0% | 136.4% |
| Togo                         | 1987.8   | 1268.1   | 2842.9   | 50.6                    | 32.3  | 72.3  | 24.7%                | -18.3% | 80.6%  |
| Tokelau                      | 0.7      | 0.4      | 1.1      | 110.4                   | 63.5  | 165.7 | 25.5%                | -28.9% | 100.5% |
| Tonga                        | 25.4     | 17.6     | 35.7     | 51.9                    | 36.1  | 73.1  | 34.0%                | -12.2% | 101.2% |
| Trinidad and Tobago          | 961.5    | 669.5    | 1319.7   | 138.4                   | 96.4  | 190.0 | 28.4%                | -10.8% | 76.7%  |
| Tunisia                      | 4673.7   | 3245.8   | 6432.8   | 77.4                    | 53.7  | 106.5 | 69.8%                | 8.0%   | 151.2% |
| Turkey                       | 50299.1  | 39383.8  | 63594.5  | 110.2                   | 86.3  | 139.3 | -9.9%                | -37.1% | 29.1%  |
| Turkmenistan                 | 2164.0   | 1709.6   | 2814.1   | 82.1                    | 64.9  | 106.8 | -17.9%               | -36.4% | 7.6%   |
| Tuvalu                       | 7.0      | 4.6      | 9.9      | 115.8                   | 75.9  | 163.9 | 7.4%                 | -30.5% | 58.7%  |
| Uganda                       | 14139.2  | 10054.5  | 19583.7  | 74.9                    | 53.3  | 103.7 | 105.6%               | 32.1%  | 227.3% |
| Ukraine                      | 47078.5  | 38741.8  | 57603.0  | 226.5                   | 186.4 | 277.2 | -8.5%                | -25.9% | 13.7%  |
| United Arab Emirates         | 7366.2   | 4925.0   | 10417.0  | 105.7                   | 70.7  | 149.5 | 58.0%                | -14.4% | 185.3% |
| United Kingdom               | 34838.5  | 33720.3  | 36015.8  | 114.3                   | 110.6 | 118.2 | -12.8%               | -16.2% | -9.7%  |
| United Republic of Tanzania  | 17401.8  | 11794.3  | 25493.5  | 65.3                    | 44.2  | 95.6  | 33.4%                | -10.3% | 94.6%  |
| United States of America     | 205247.8 | 197213.9 | 213729.7 | 136.3                   | 131.0 | 142.0 | 13.4%                | 8.4%   | 20.2%  |
| United States Virgin Islands | 89.9     | 64.7     | 127.0    | 207.0                   | 149.0 | 292.4 | 26.1%                | -14.0% | 85.7%  |
| Uruguay                      | 2702.6   | 2407.7   | 3021.1   | 164.0                   | 146.1 | 183.3 | -1.6%                | -15.6% | 13.6%  |
| Uzbekistan                   | 16091.8  | 13383.7  | 19266.5  | 89.0                    | 74.0  | 106.6 | -6.8%                | -23.2% | 12.2%  |
| Vanuatu                      | 139.7    | 88.1     | 199.0    | 96.1                    | 60.6  | 136.9 | 39.4%                | -16.9% | 123.6% |
| Venezuela                    | 15599.3  | 11379.0  | 21016.5  | 108.4                   | 79.1  | 146.0 | 68.8%                | 22.2%  | 128.7% |
| Viet Nam                     | 80206.8  | 57338.9  | 109563.3 | 151.3                   | 108.1 | 206.6 | 176.6%               | 73.0%  | 329.4% |
| Yemen                        | 7883.3   | 5129.8   | 11271.7  | 50.4                    | 32.8  | 72.1  | 27.7%                | -28.7% | 135.0% |
| Zambia                       | 8532.4   | 5710.2   | 12084.6  | 94.5                    | 63.3  | 133.9 | 35.9%                | -14.6% | 106.1% |
| Zimbabwe                     | 7429.8   | 5020.0   | 10391.6  | 98.8                    | 66.7  | 138.1 | 97.2%                | 27.1%  | 185.7% |

DALYs, disability-adjusted life-years; 95% UI, 95% uncertainty intervals; LUI, lower uncertainty interval; UII, upper uncertainty interval.
