# Supplementary material for: The Burden of Early-Onset Colorectal Cancer and Its Risk Factors from 1990 to 2019: A Systematic Analysis for the Global Burden of Disease Study 2019
Source: MDPI journal article supplement (doi:10.3390/cancers14143502), 2022-07-19
Supplement: s1 [file s1]

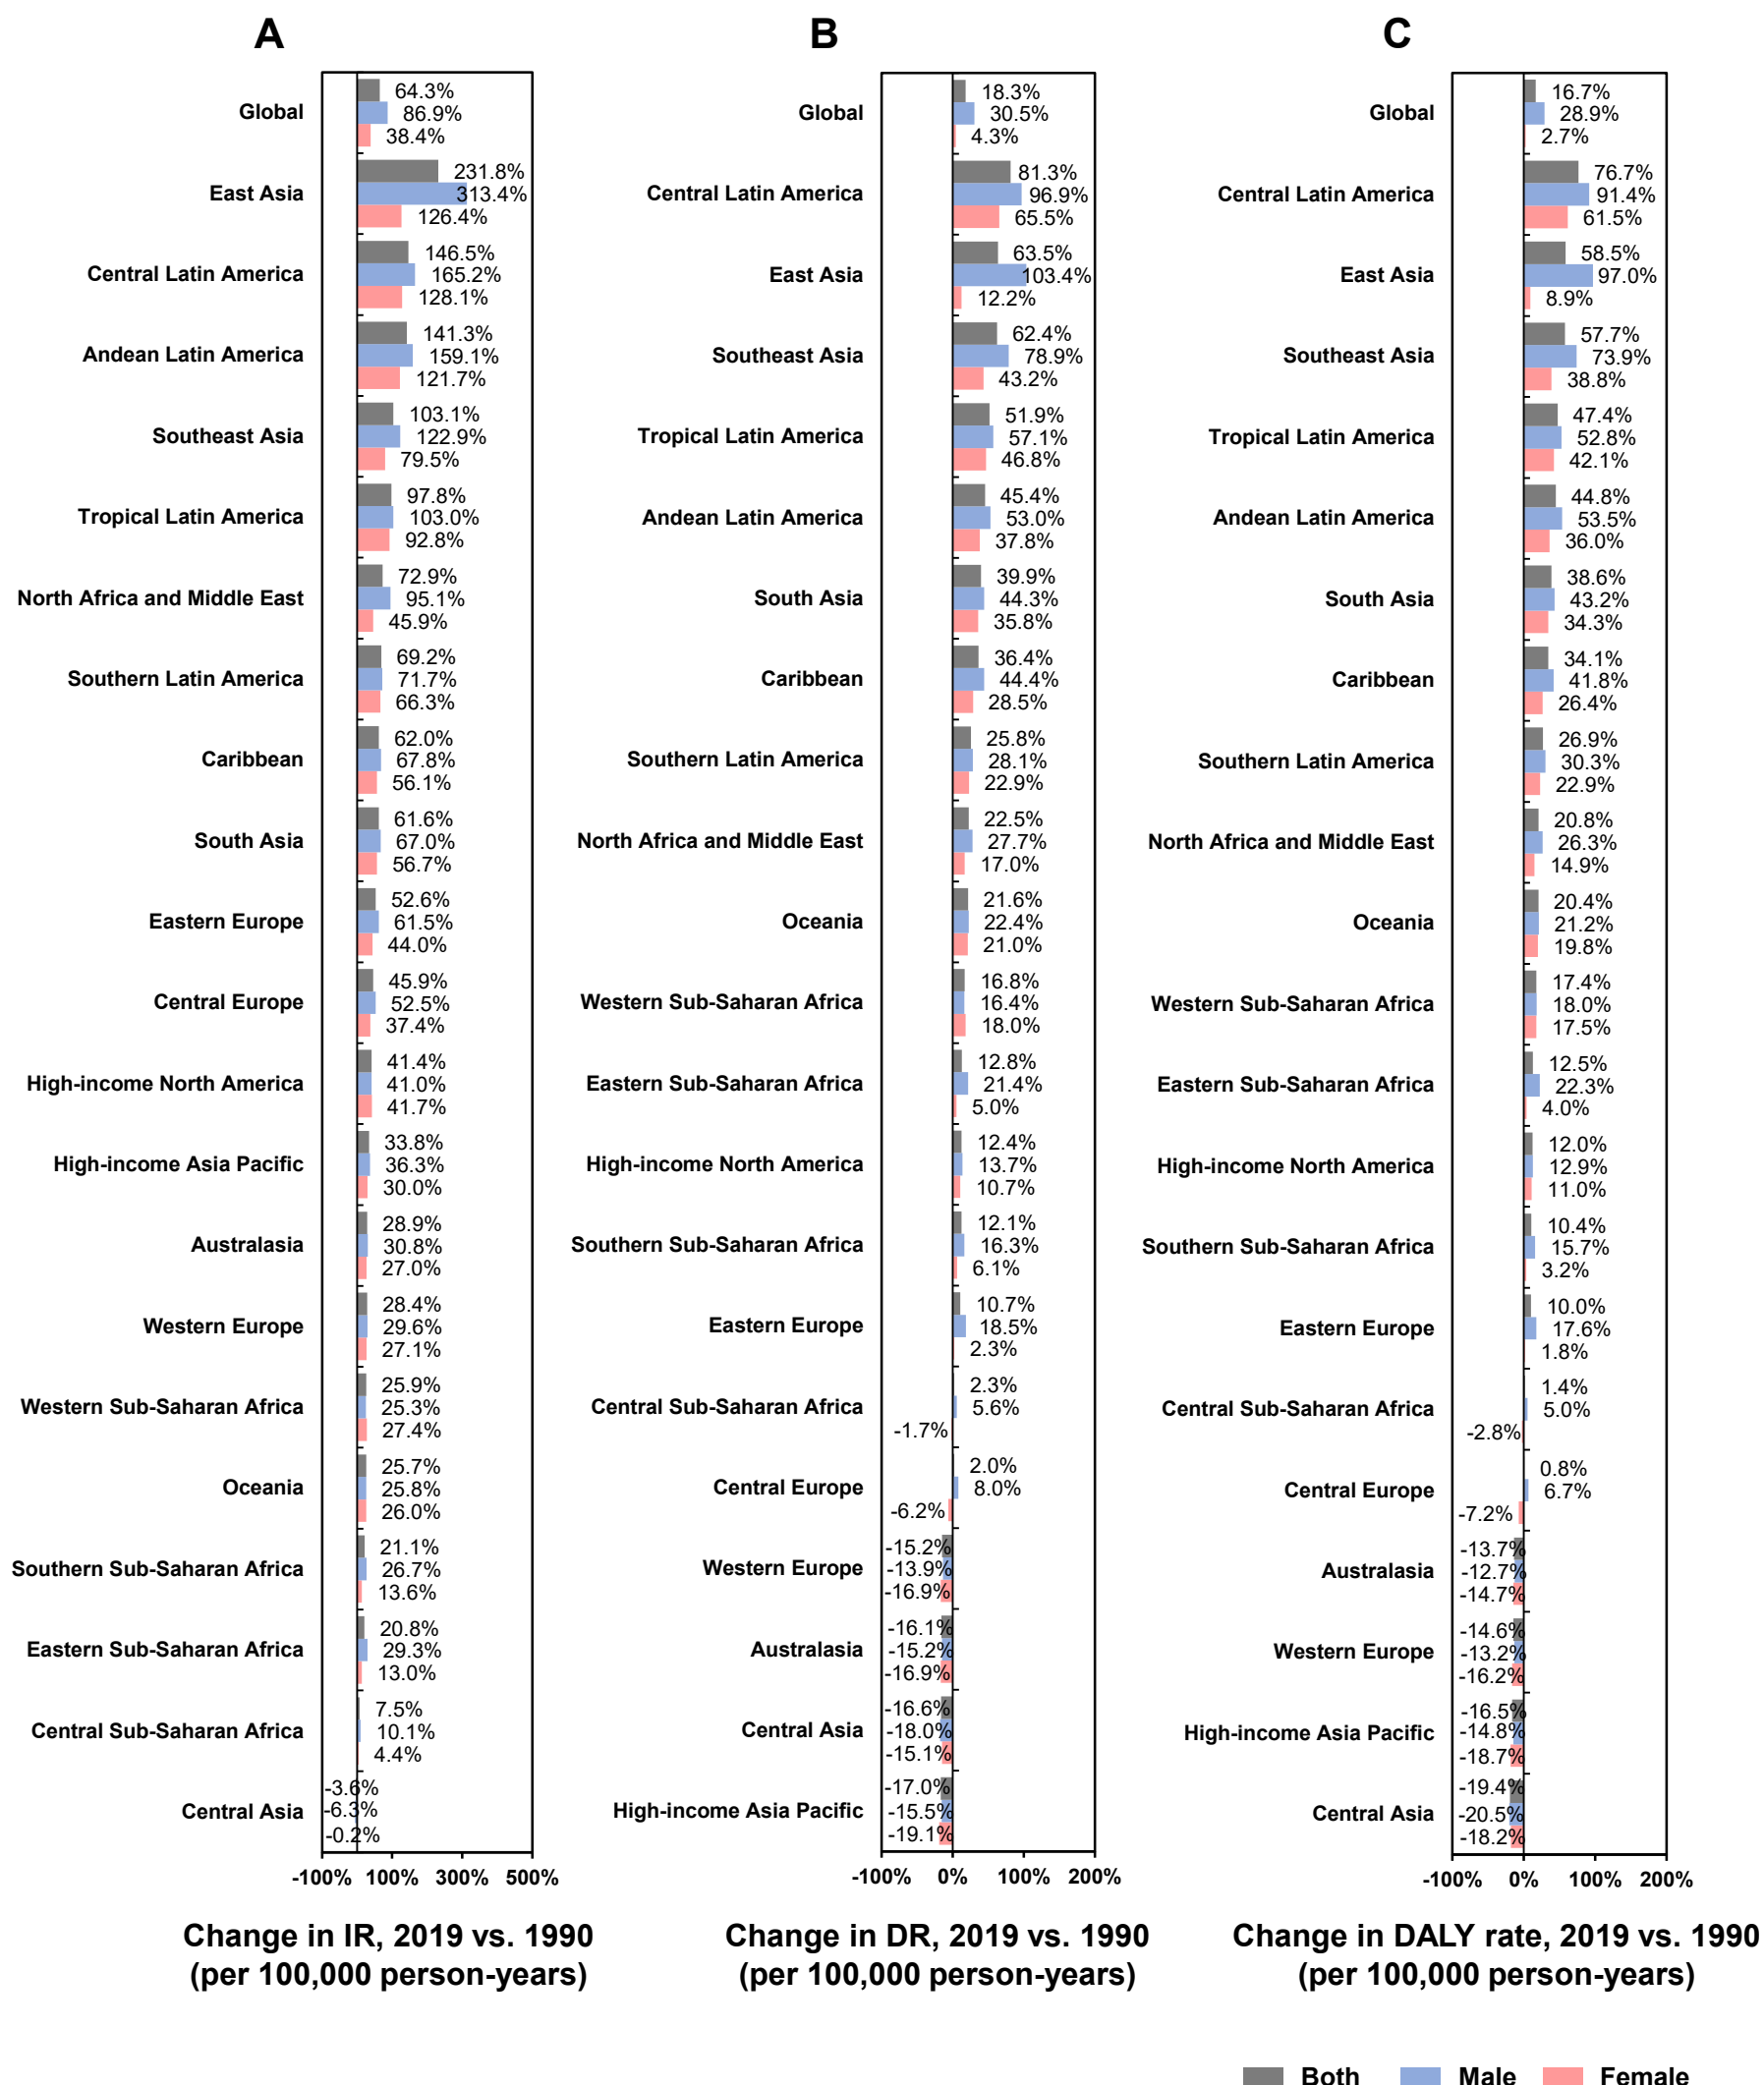

Figure S1

## A Percentage change in incidence rate, 2019 vs. 1990

Global (64.3%)

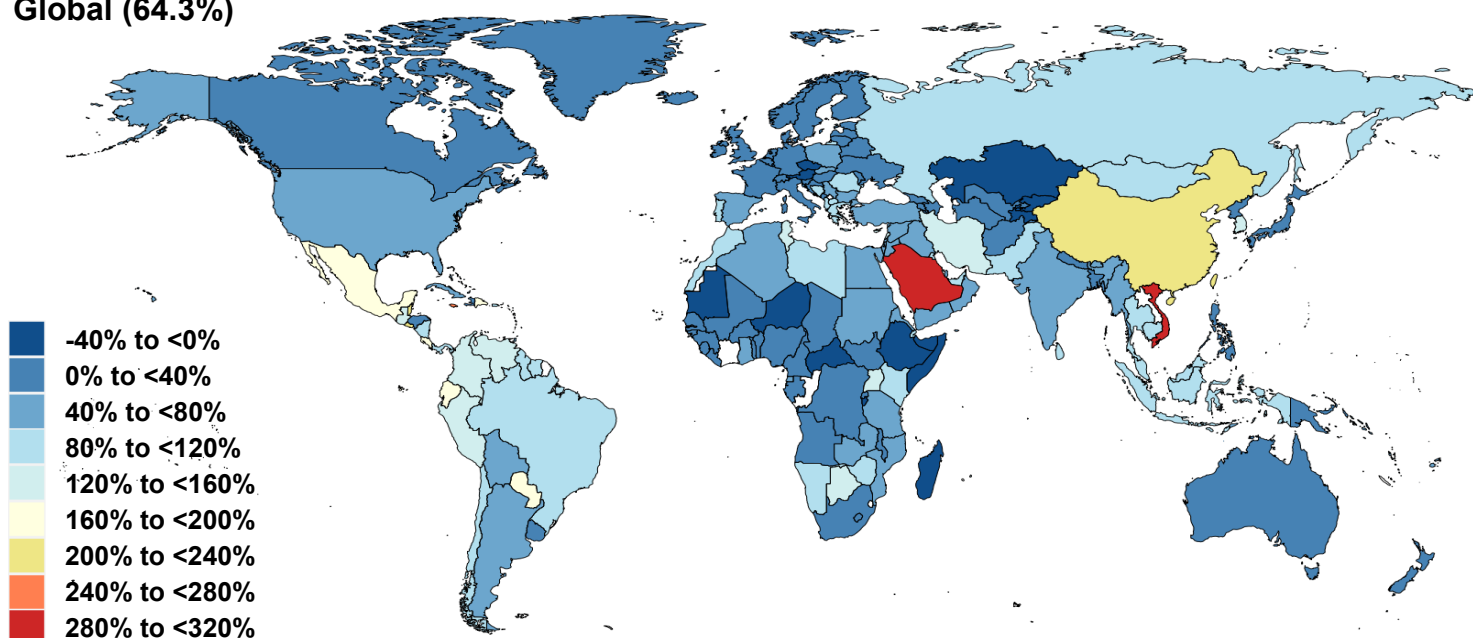

## B Percentage change in death rate, 2019 vs. 1990

Global (18.3%)

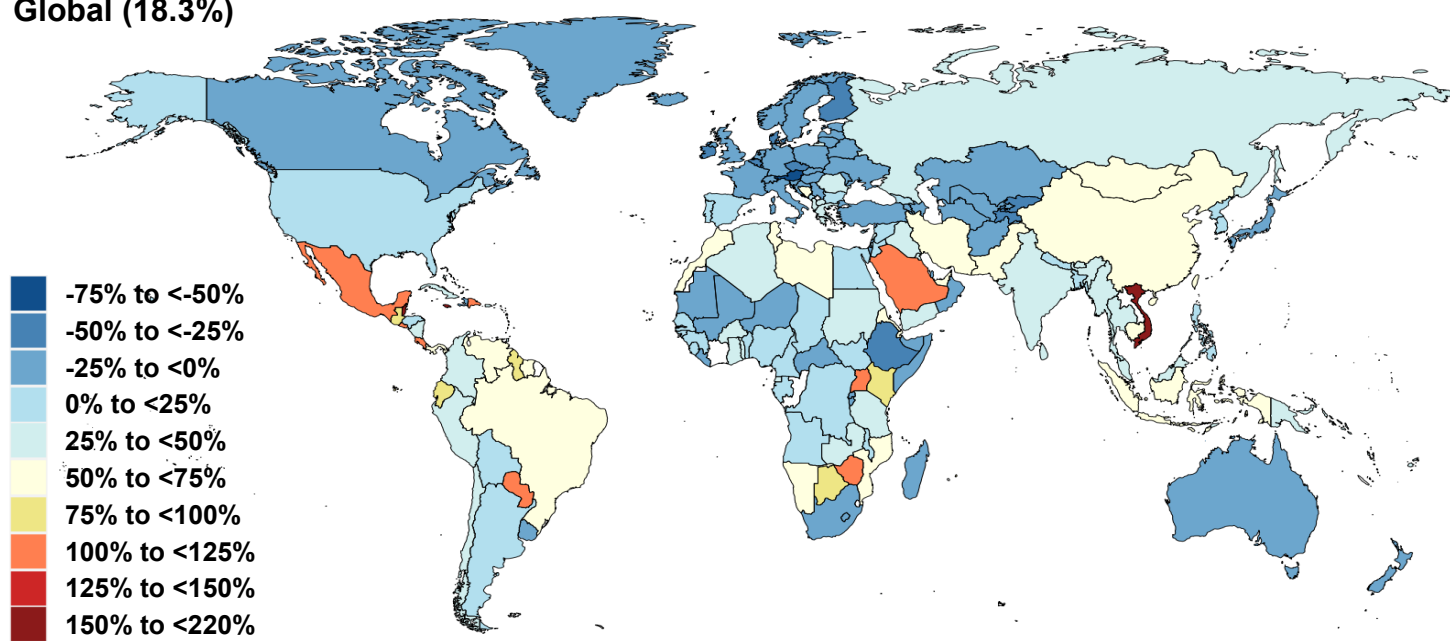

## C Percentage change in DALY rate, 2019 vs. 1990

Global (16.7%)

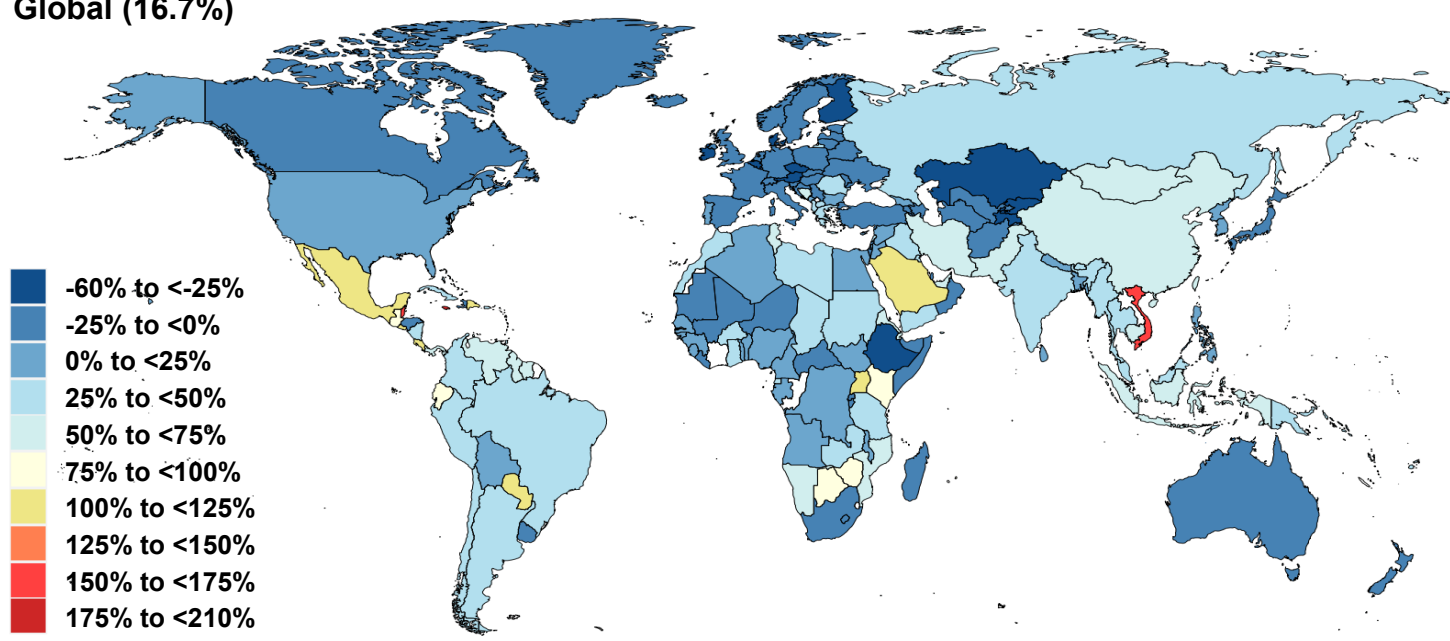

Figure S2

A

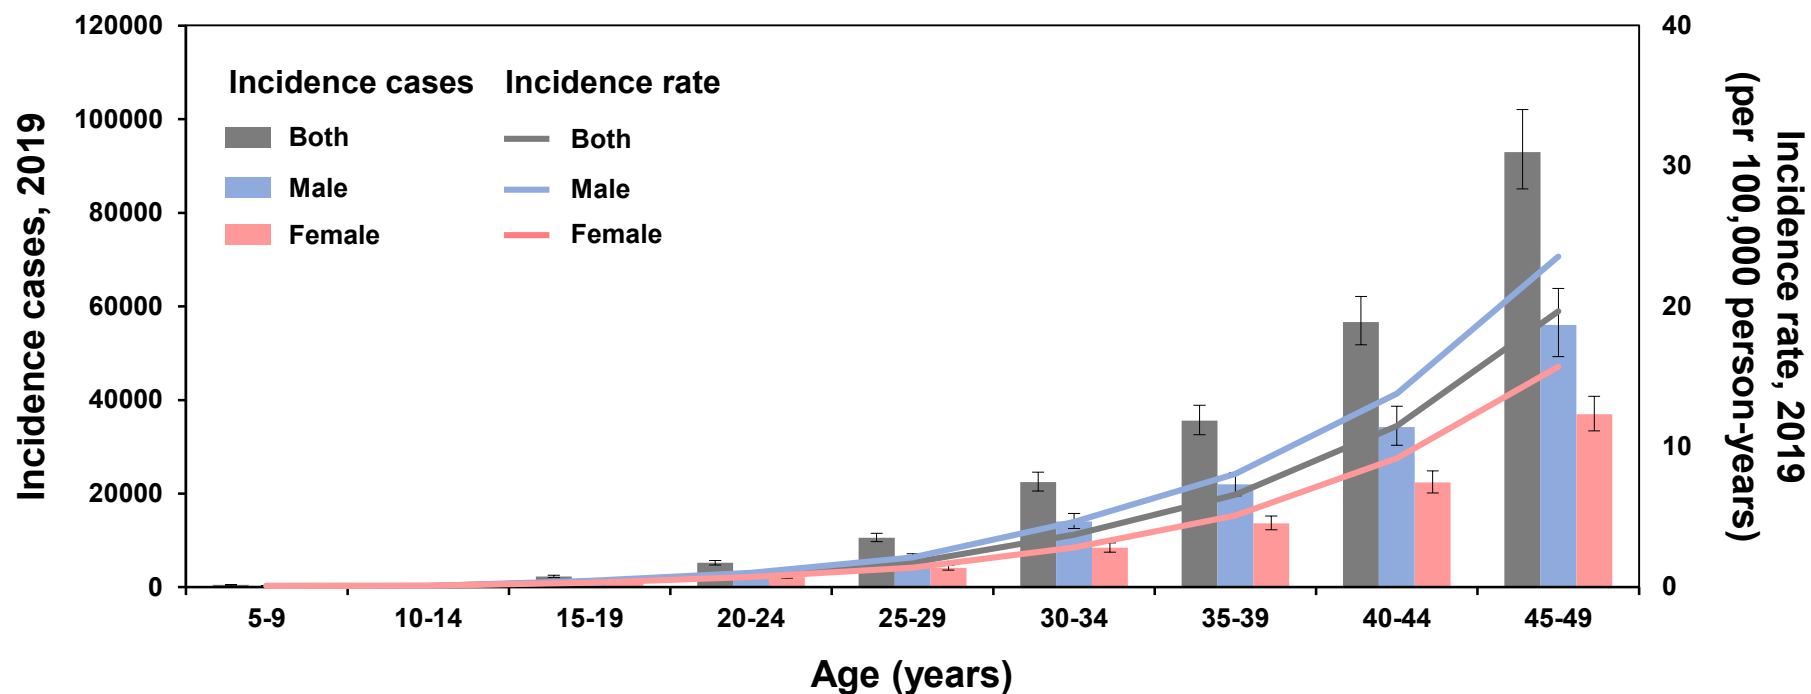

B

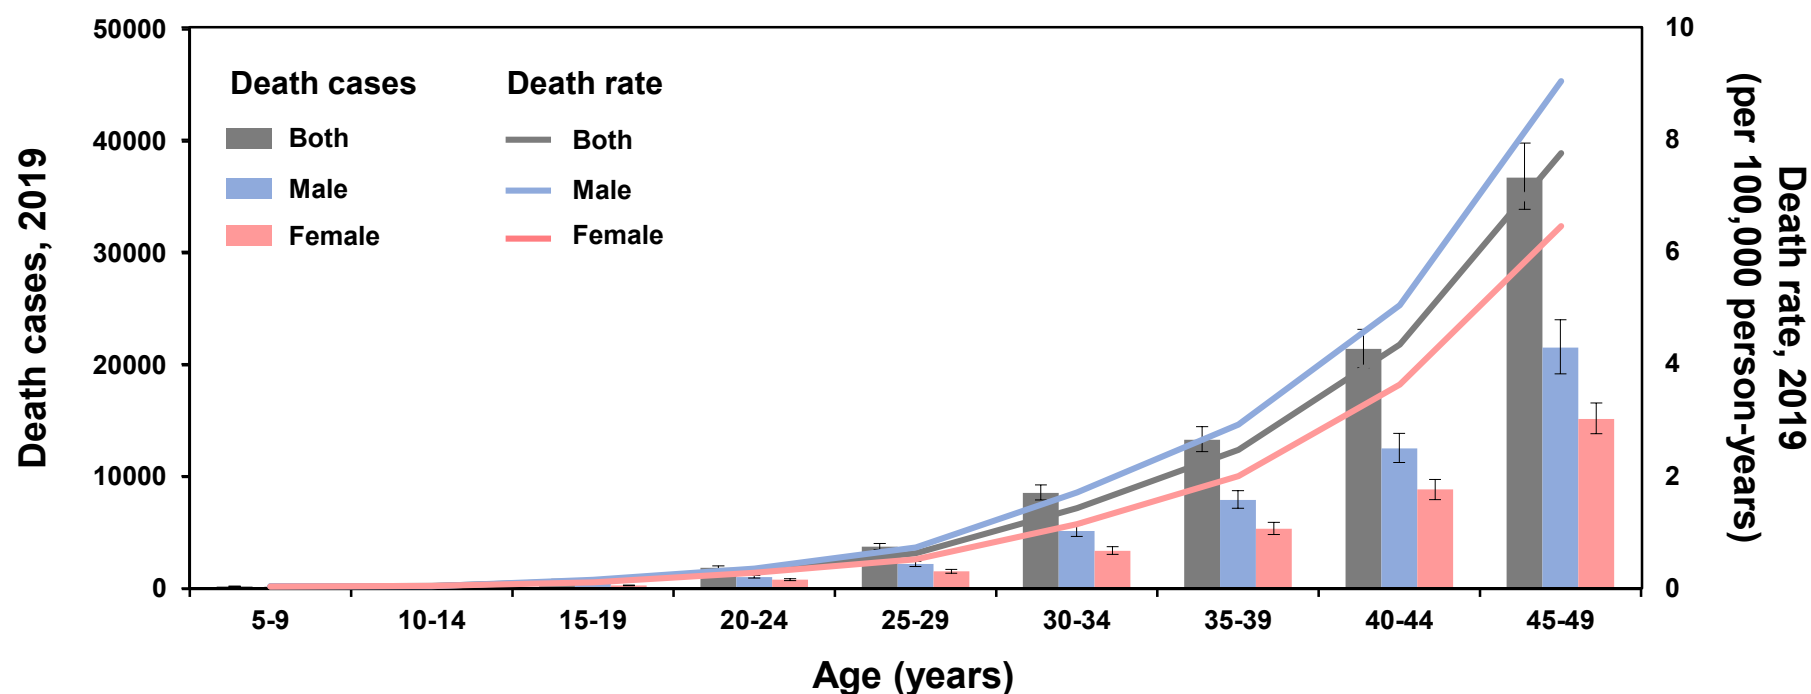

C

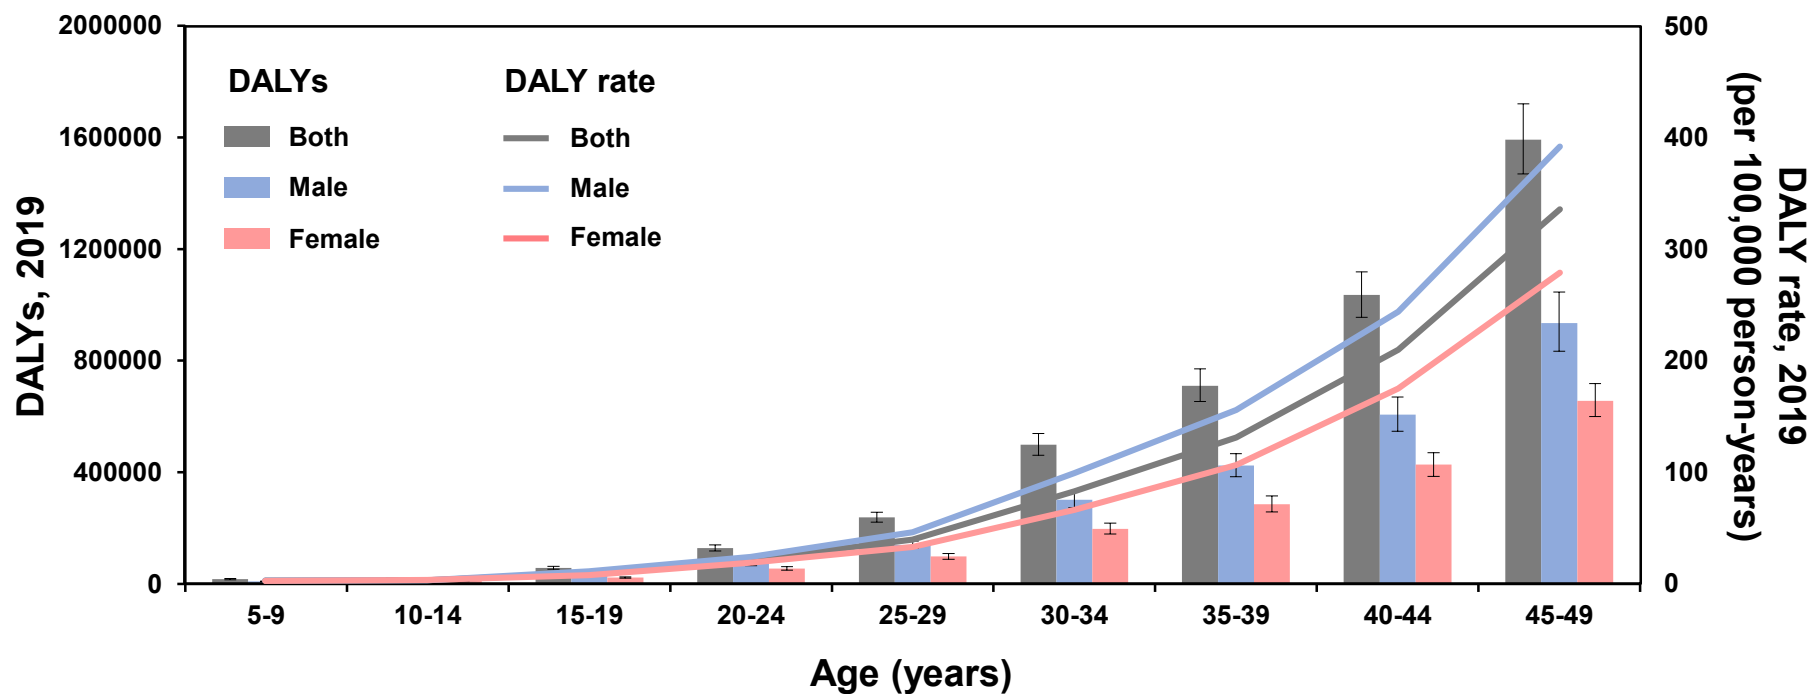

Figure S3

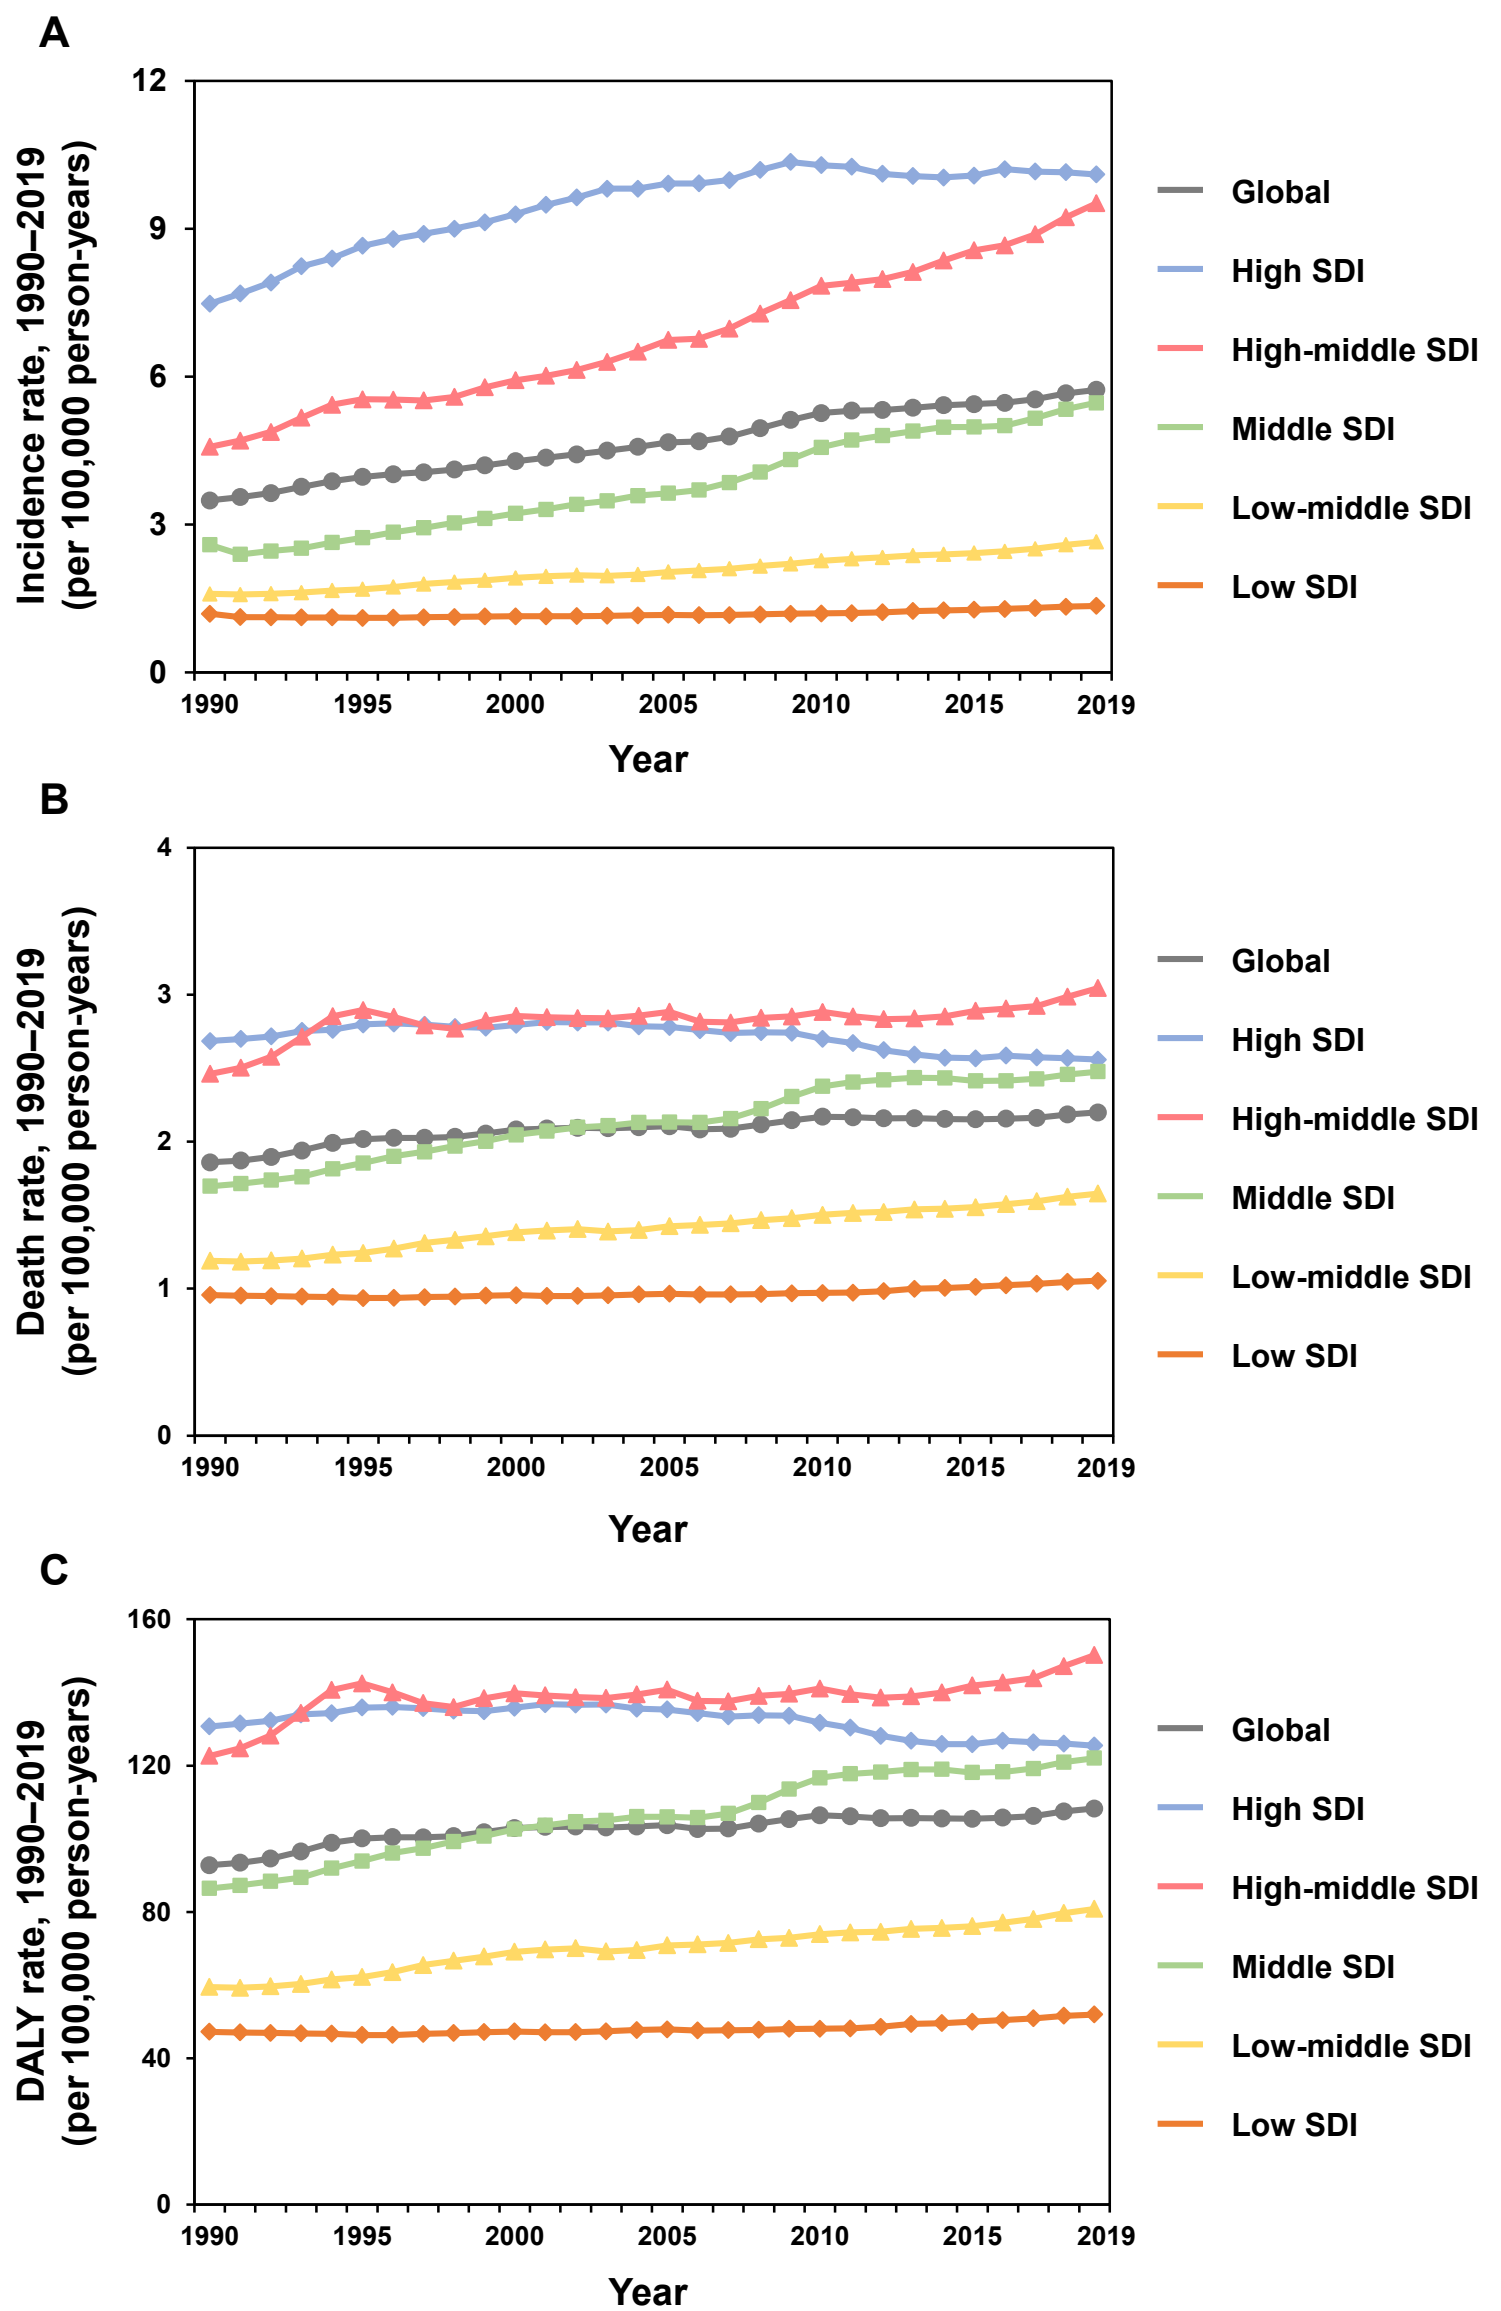

Figure S4

A

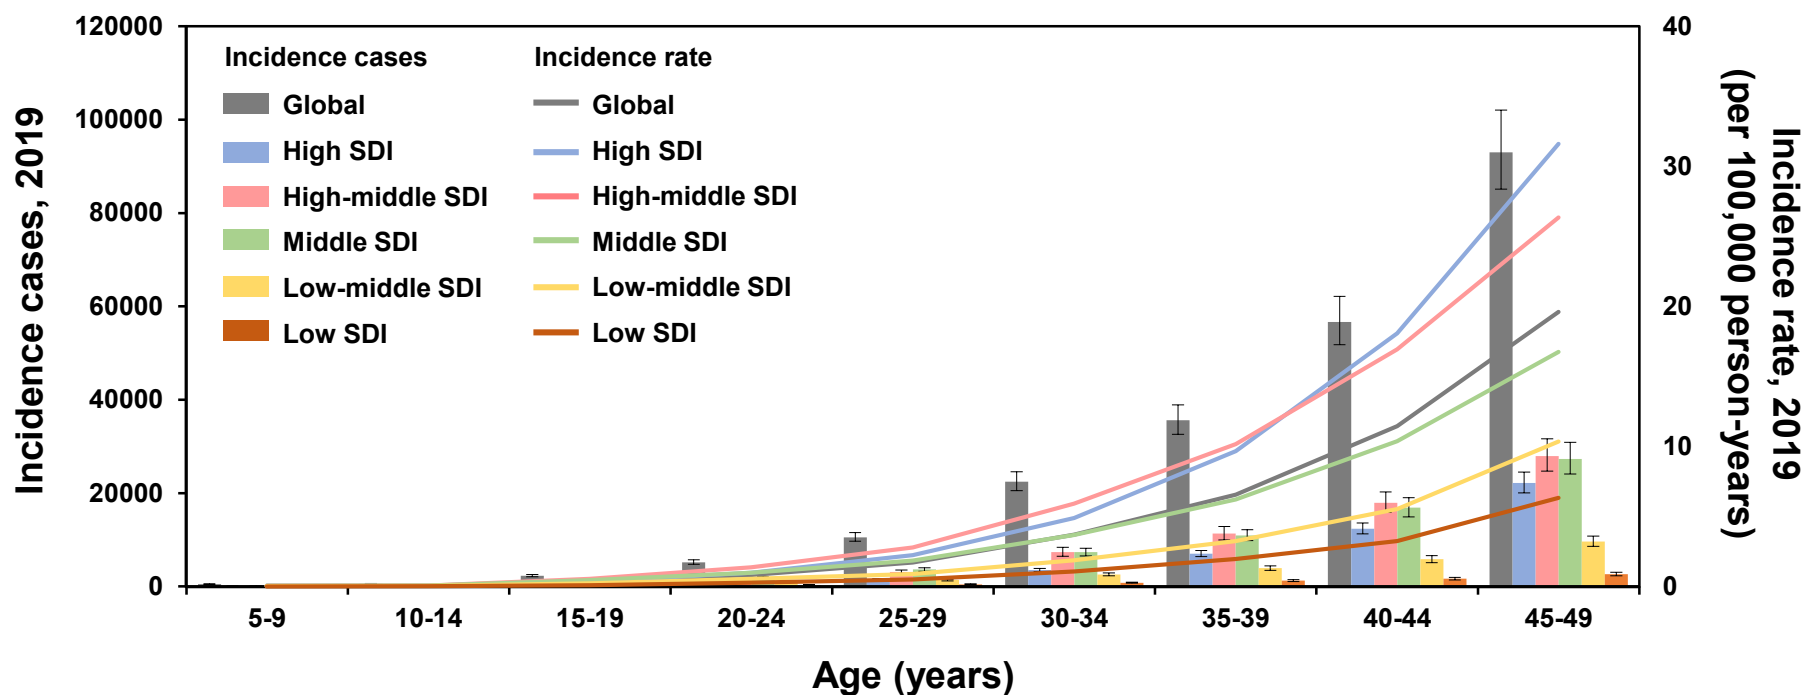

B

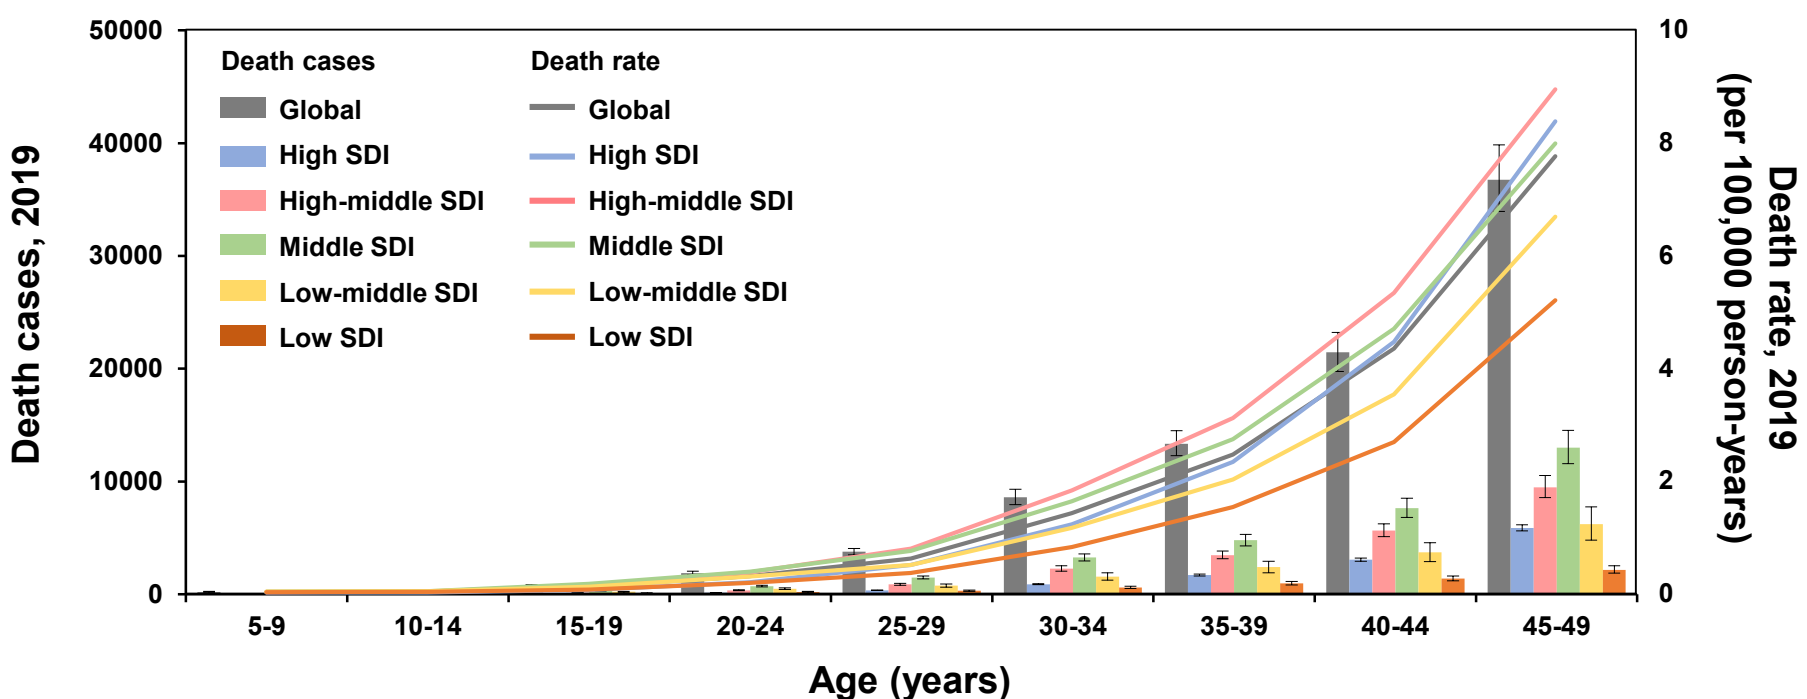

C

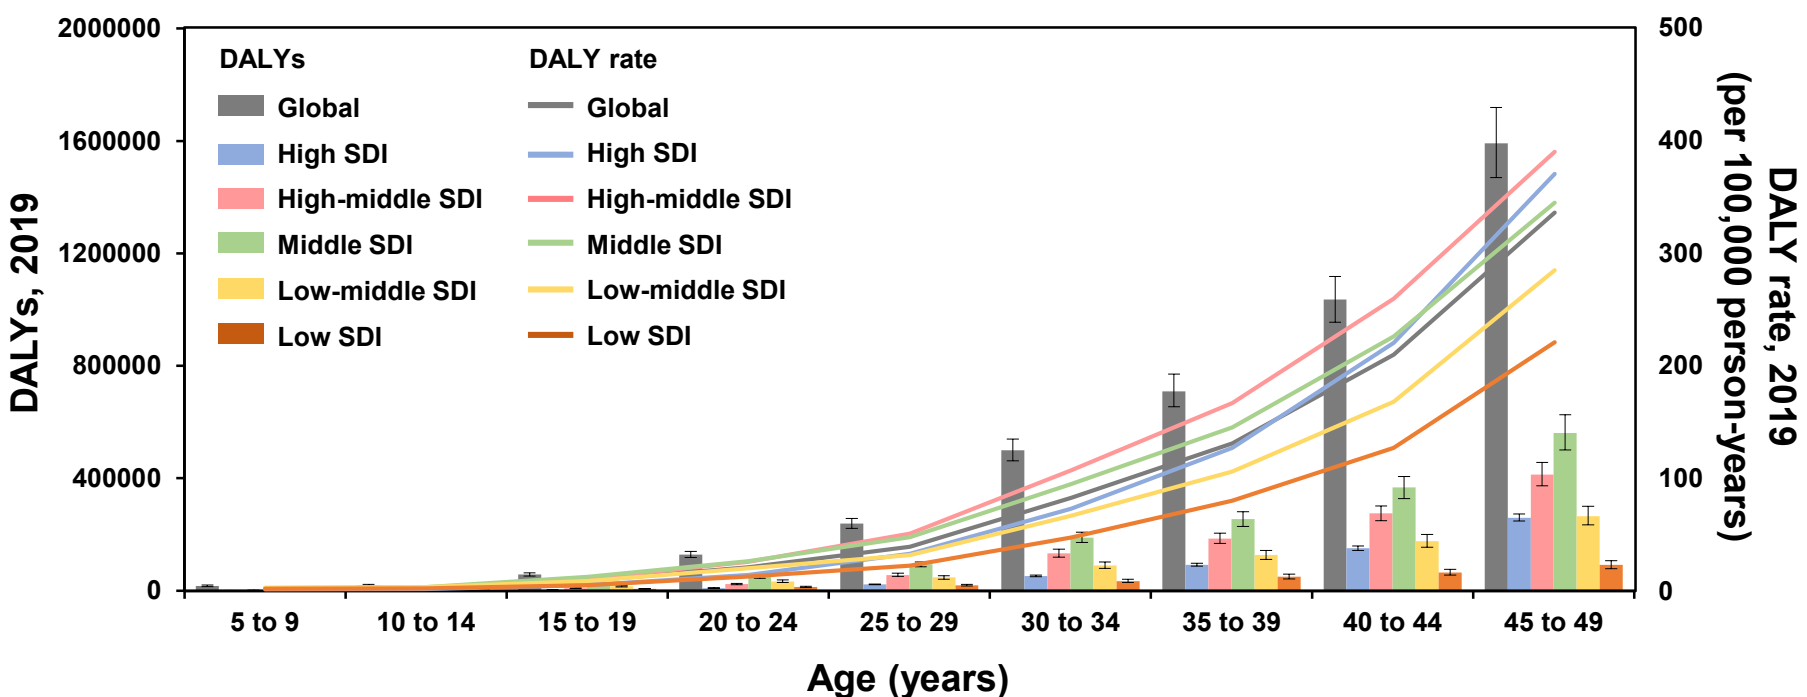

Figure S5
